# Supplementary material for: A Facile Semisynthesis and Evaluation of Garcinoic Acid and Its Analogs for the Inhibition of Human DNA Polymerase β
Source: PubMed Central journal article supplement (PMC7763917; doi:10.3390/molecules25245847), 2020-12-11

## Supporting Information

# Facile Semisynthesis and Evaluation of Garcinoic Acid and Its Analogs for the Inhibition of Human DNA Polymerase $\beta$

Satheesh Gujarathi <sup>1</sup>, Maroof Khan Zafar <sup>2</sup>, Xingui Liu <sup>1</sup>, Robert L. Eoff <sup>2</sup> and Guangrong Zheng <sup>1,3,\*</sup>

<sup>1</sup> Department of Pharmaceutical Sciences, College of Pharmacy, University of Arkansas for Medical Sciences, Little Rock, AR 72205, USA

<sup>2</sup> Department of Biochemistry and Molecular Biology, College of Medicine, University of Arkansas for Medical Sciences, Little Rock, AR 72205, USA

<sup>3</sup> Department of Medicinal Chemistry, College of Pharmacy, University of Florida, Gainesville, FL 32610, USA

### Table of Contents

|                                                             |     |
|-------------------------------------------------------------|-----|
| Figure S1.....                                              | S-2 |
| Copies of <sup>1</sup> H & <sup>13</sup> C NMR Spectra..... | S-3 |

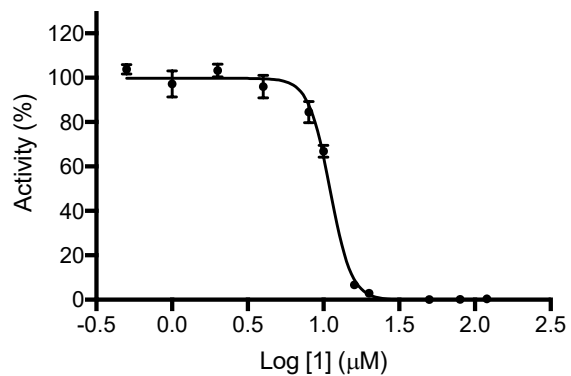

$\text{IC}_{50} = 11 \mu\text{M}$

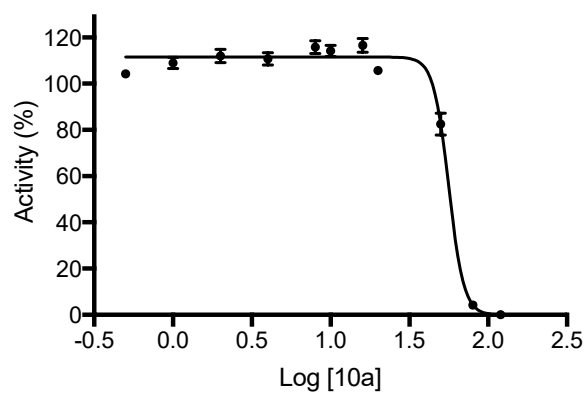

$\text{IC}_{50} = 52 \mu\text{M}$

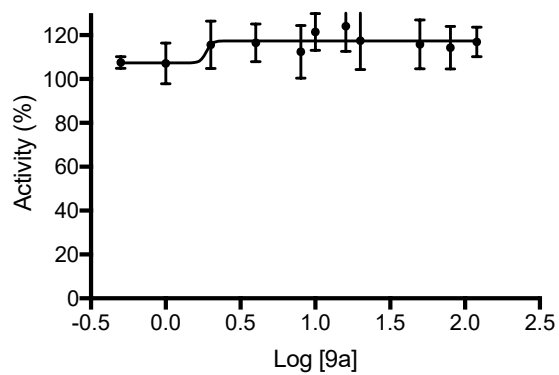

$\text{IC}_{50} = >120 \mu\text{M}$

**Figure S1.**  $\text{IC}_{50}$  determination of garcinoic acid (**1**), **10a**, and **9a** against hpol  $\beta$ .

<sup>1</sup>H and <sup>13</sup>C NMR spectra of 4

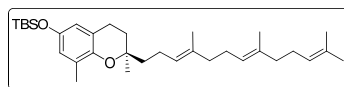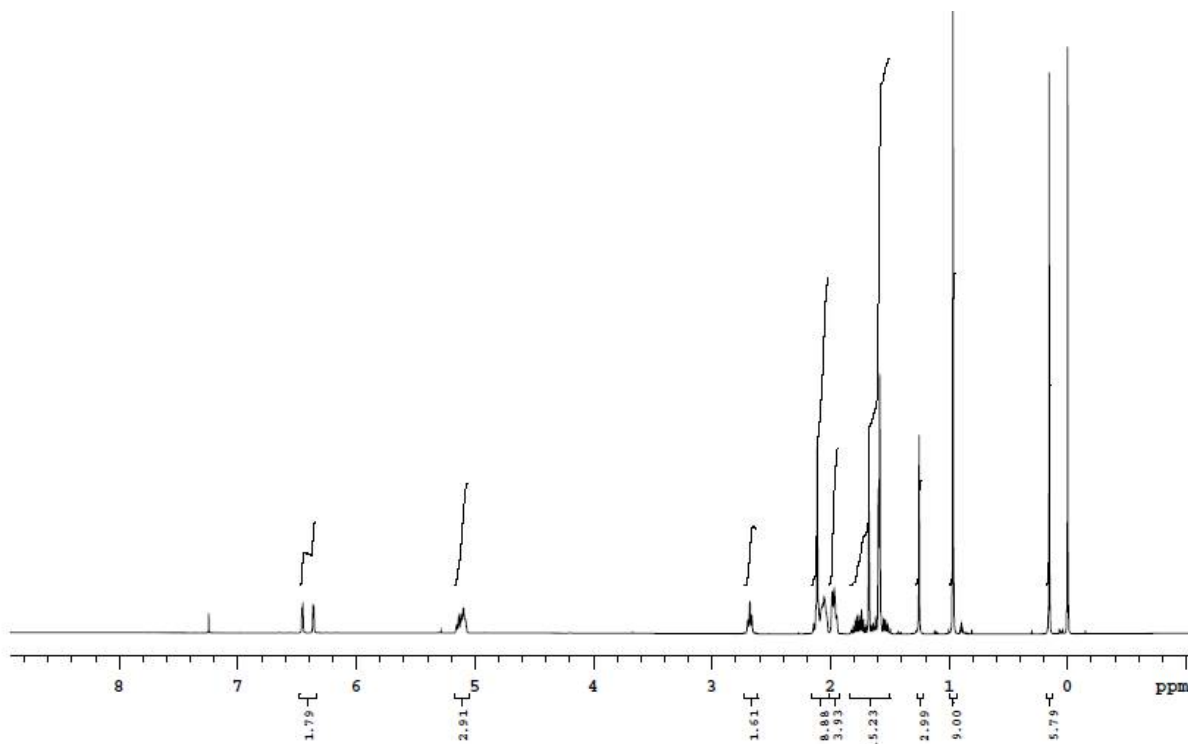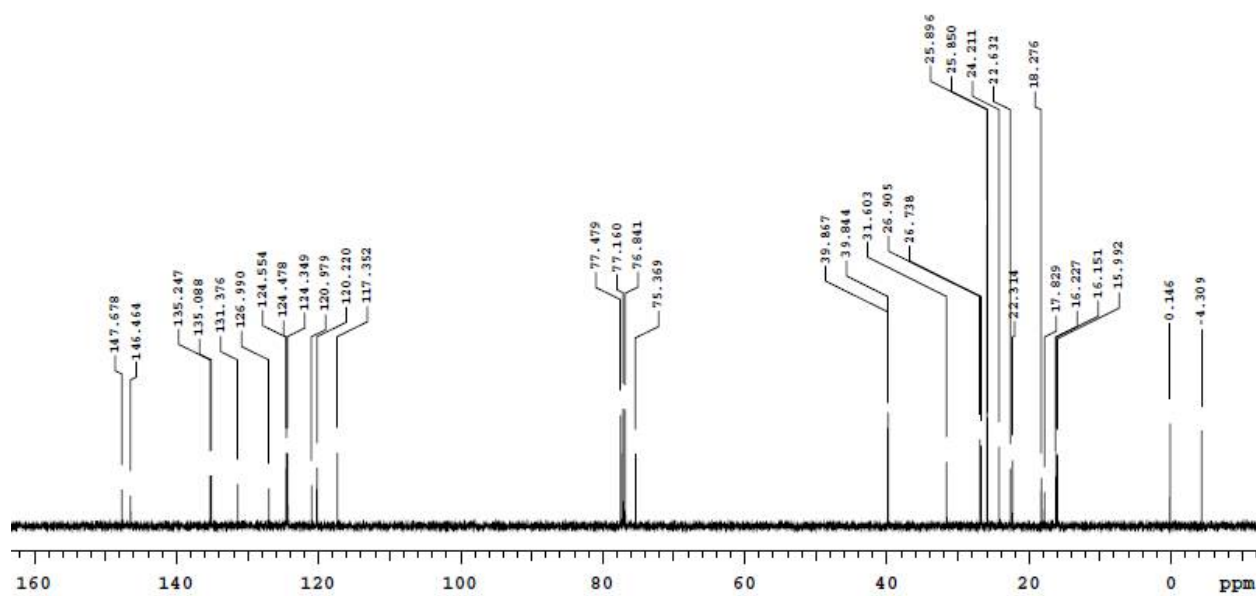

<sup>1</sup>H and <sup>13</sup>C NMR spectra of 6a

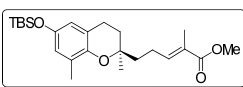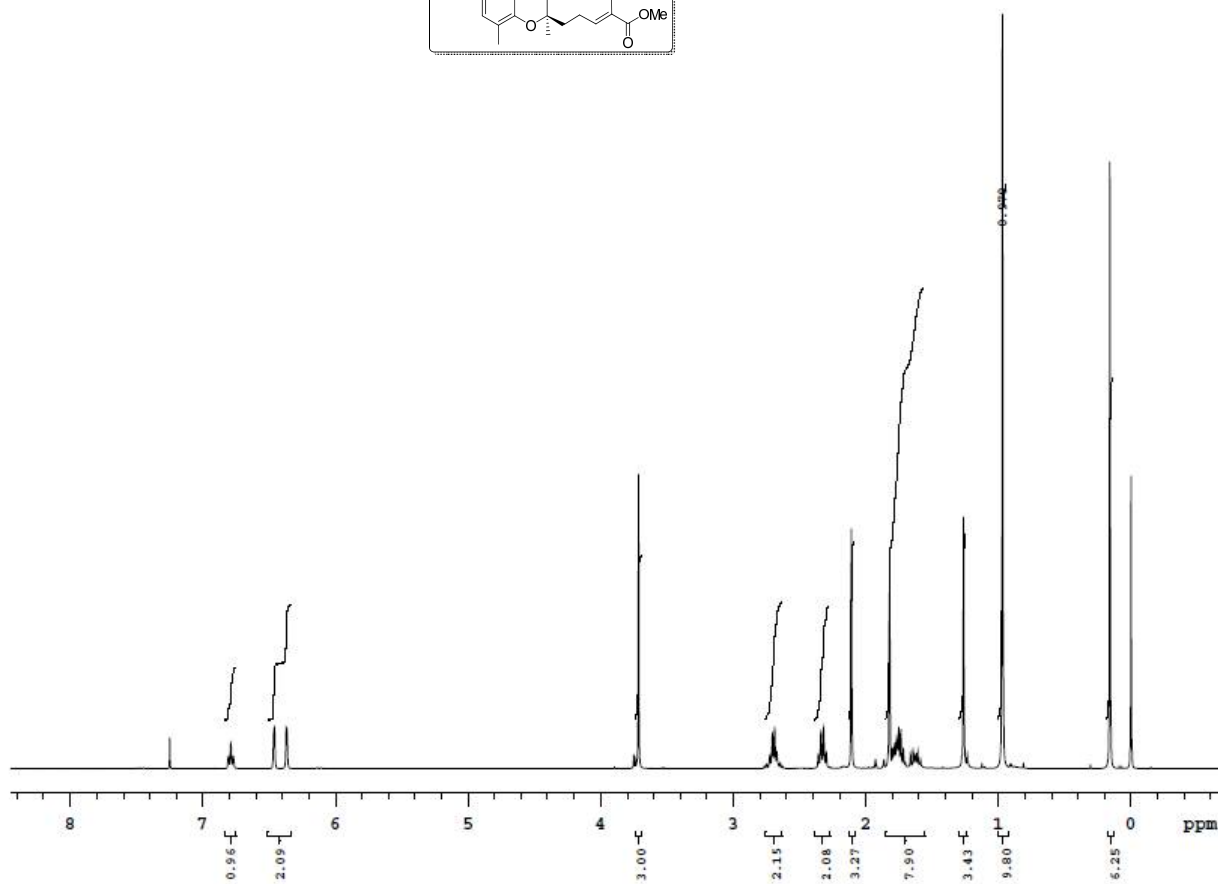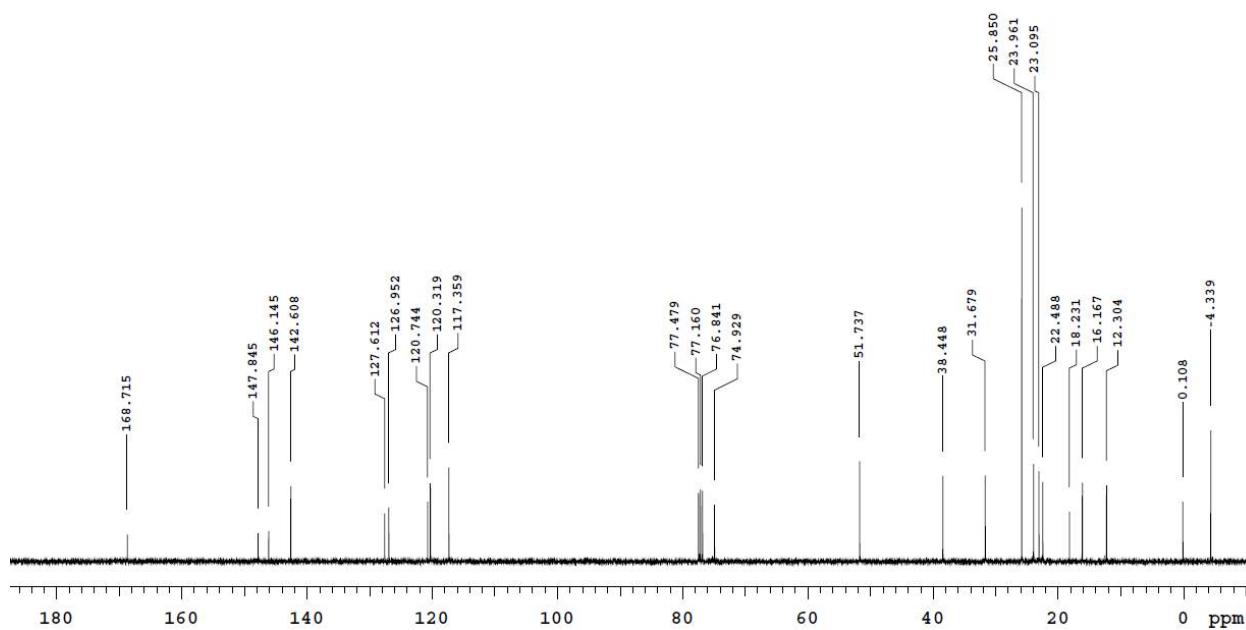

$^1\text{H}$  and  $^{13}\text{C}$  NMR spectra of 7a

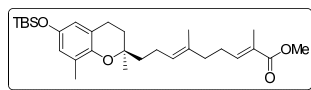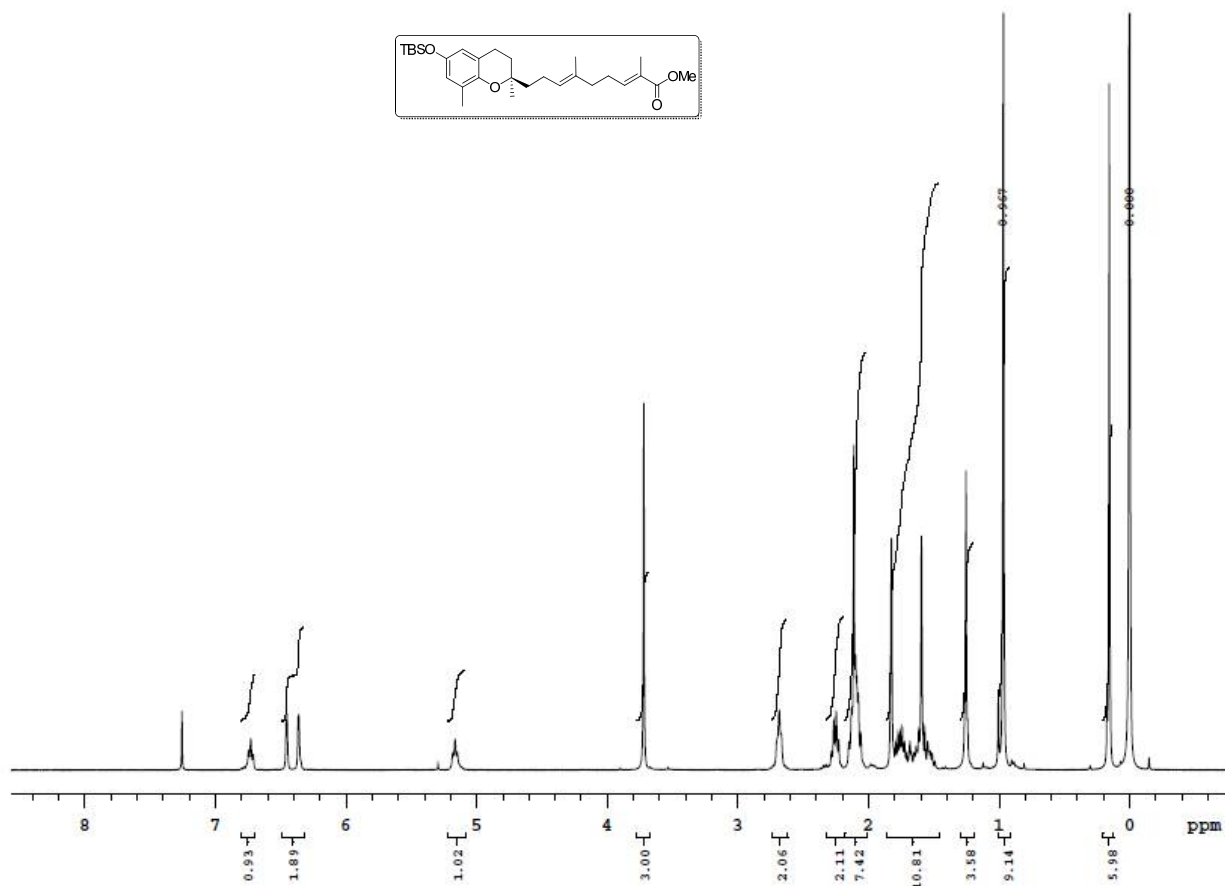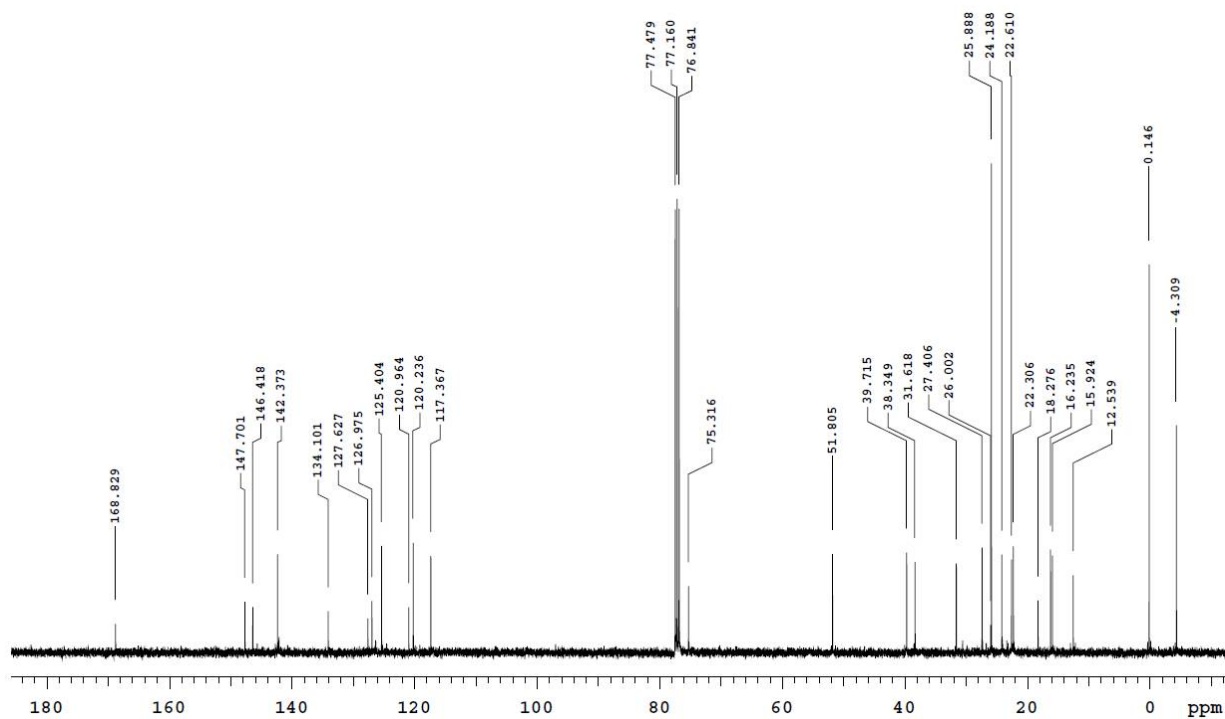

$^1\text{H}$  and  $^{13}\text{C}$  NMR spectra of 8a

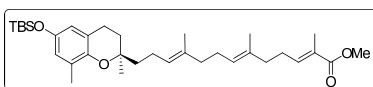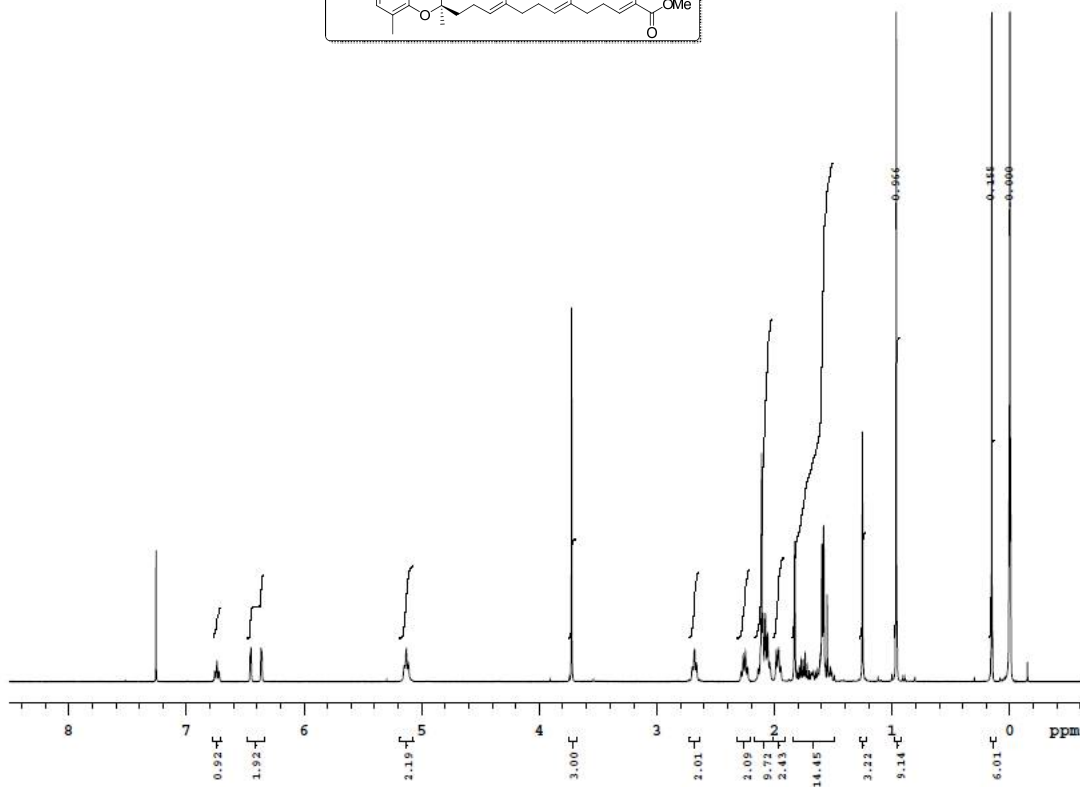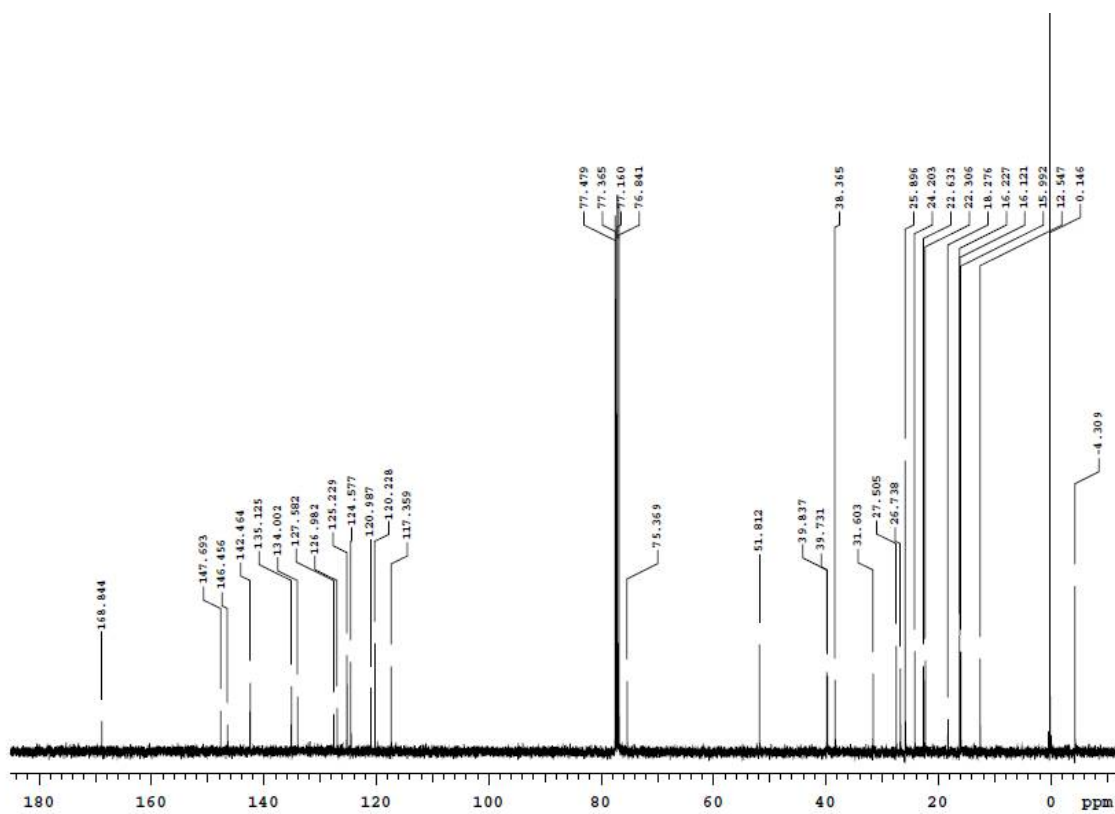

$^1\text{H}$  and  $^{13}\text{C}$  NMR spectra of 6b

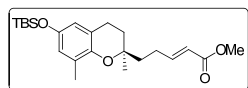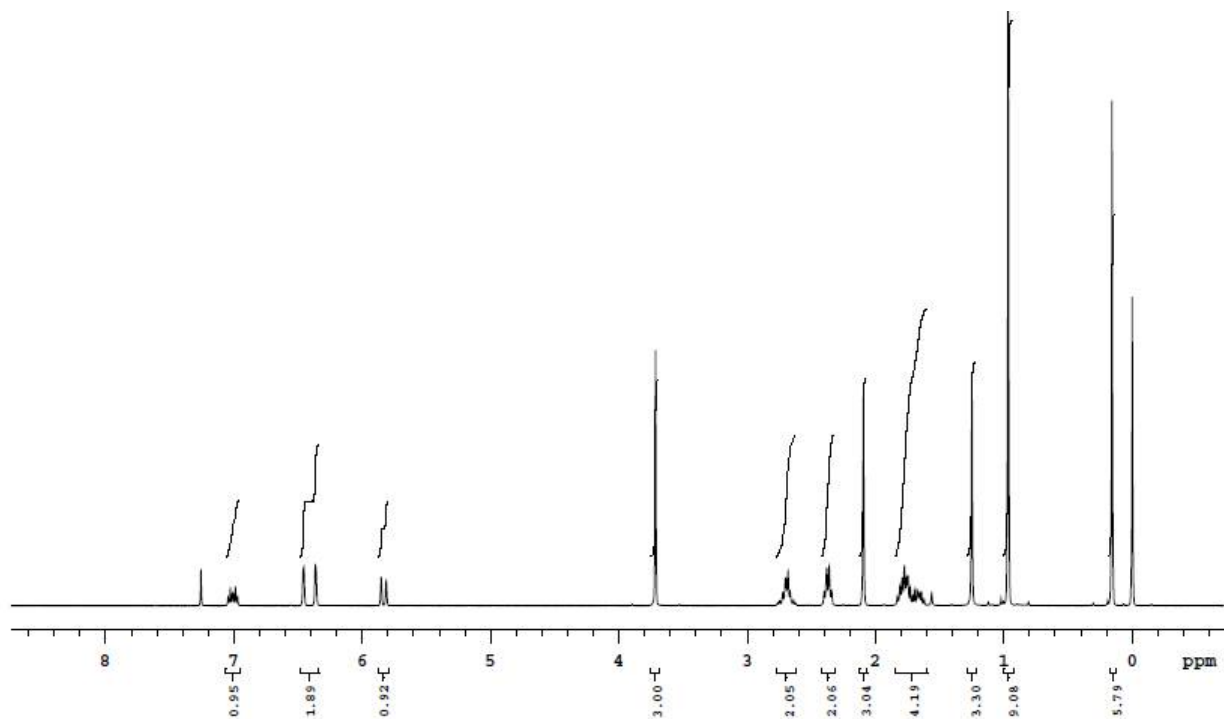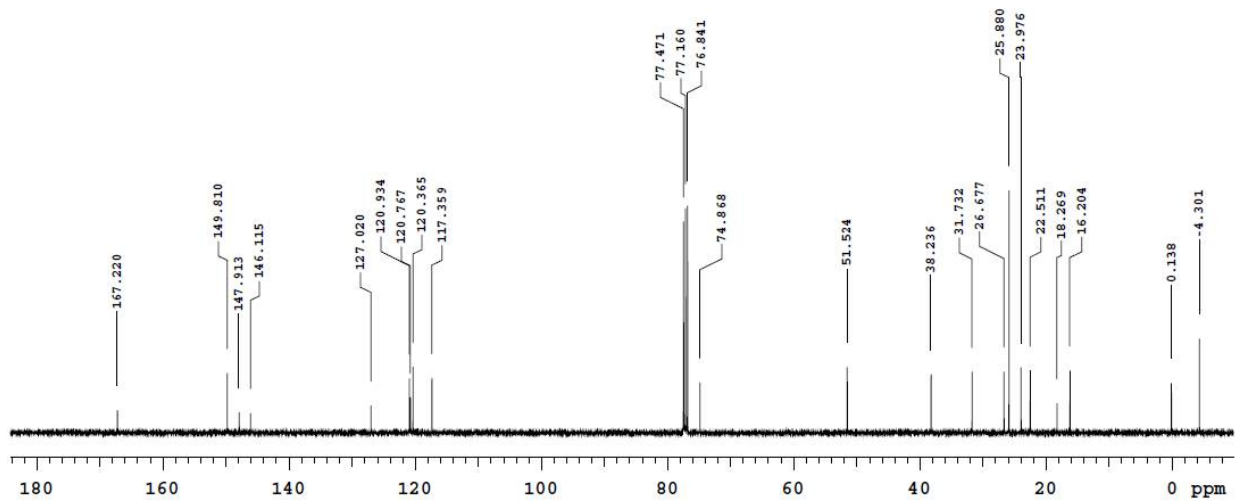

$^1\text{H}$  and  $^{13}\text{C}$  NMR spectra of 7b

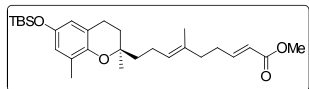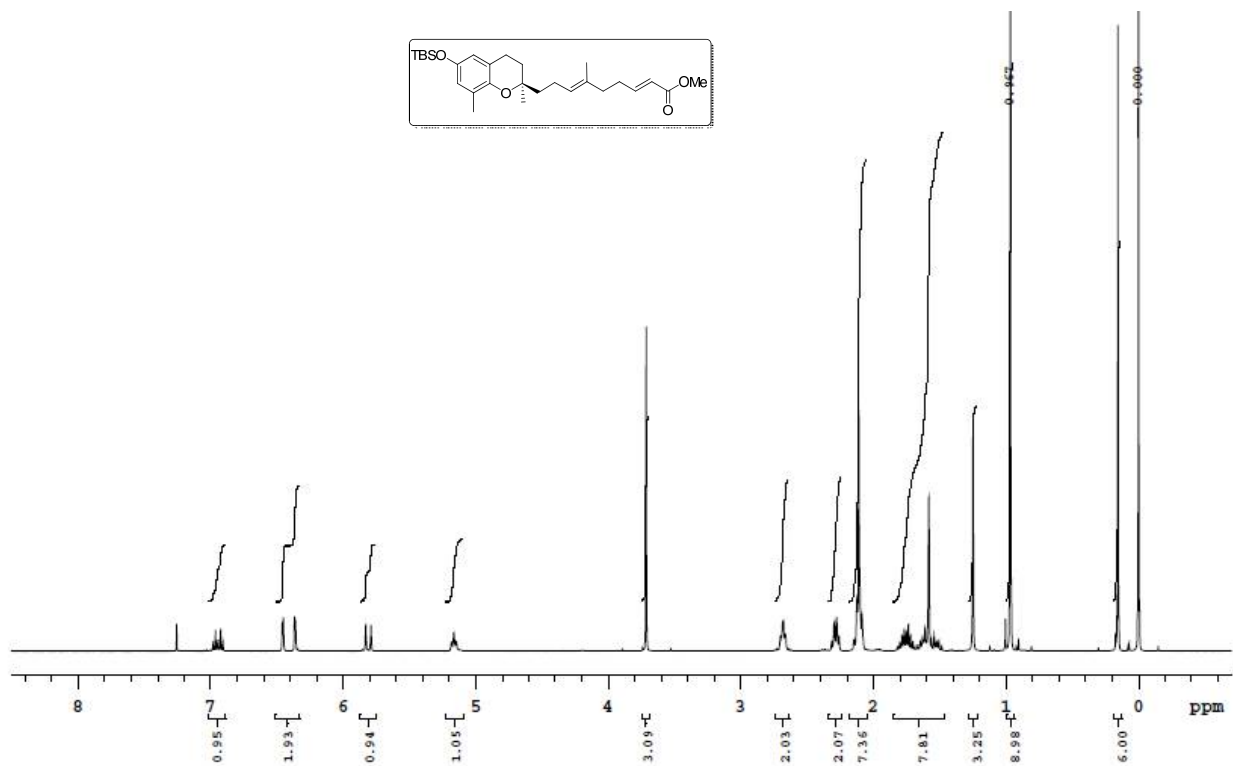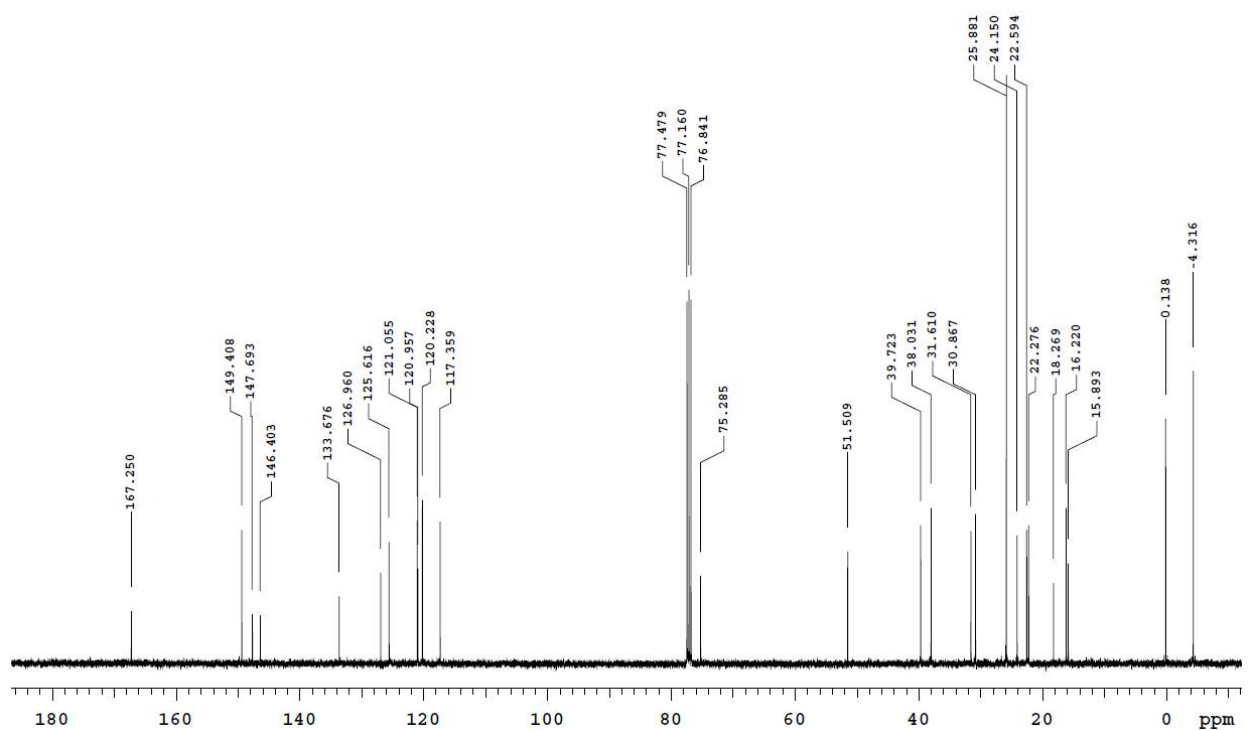



$^1\text{H}$  and  $^{13}\text{C}$  NMR spectra of 8b

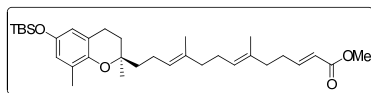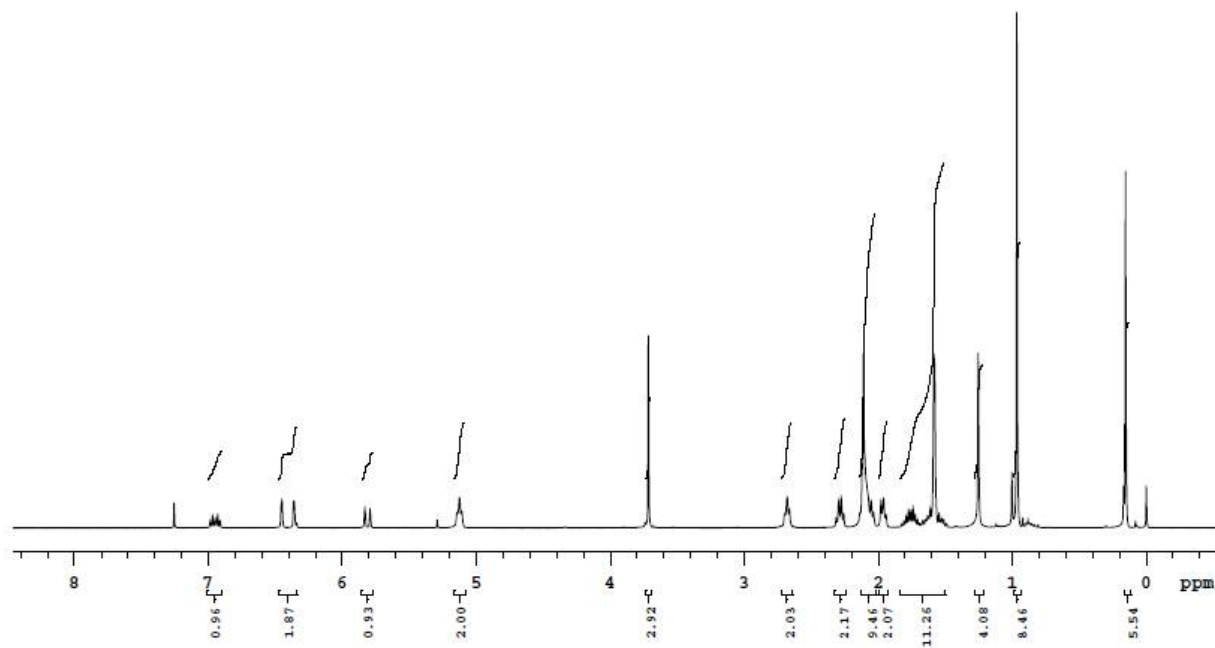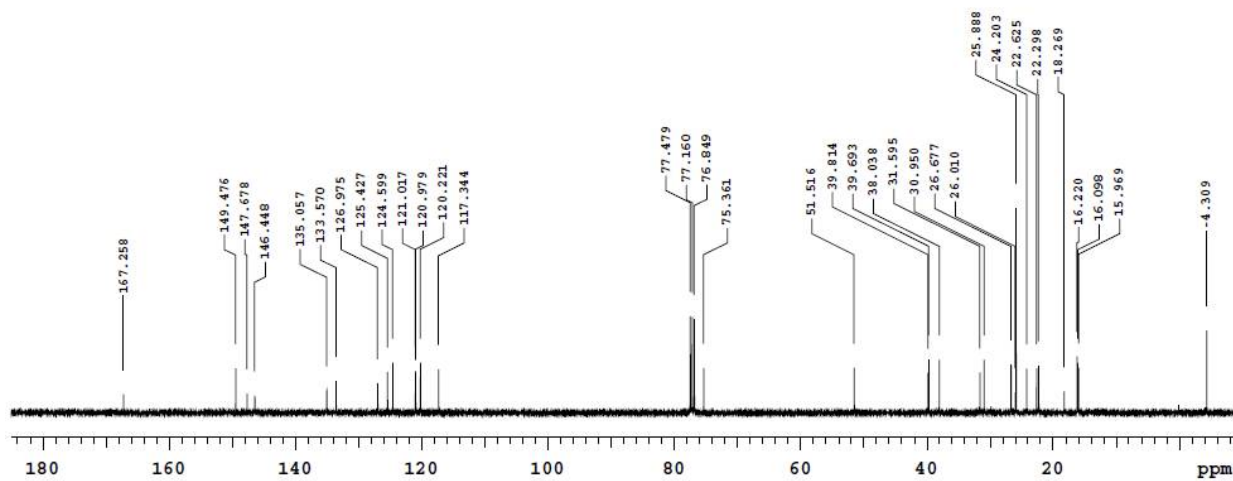

<sup>1</sup>H and <sup>13</sup>C NMR spectra of 9a

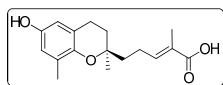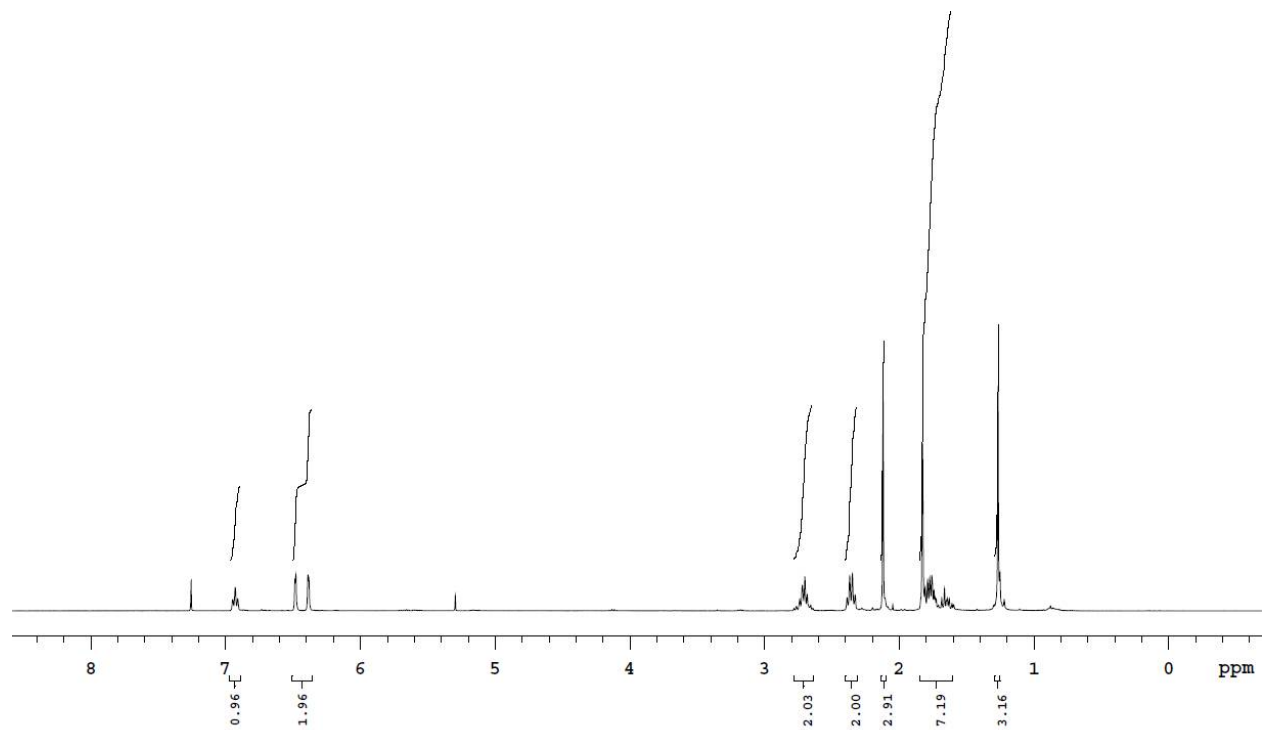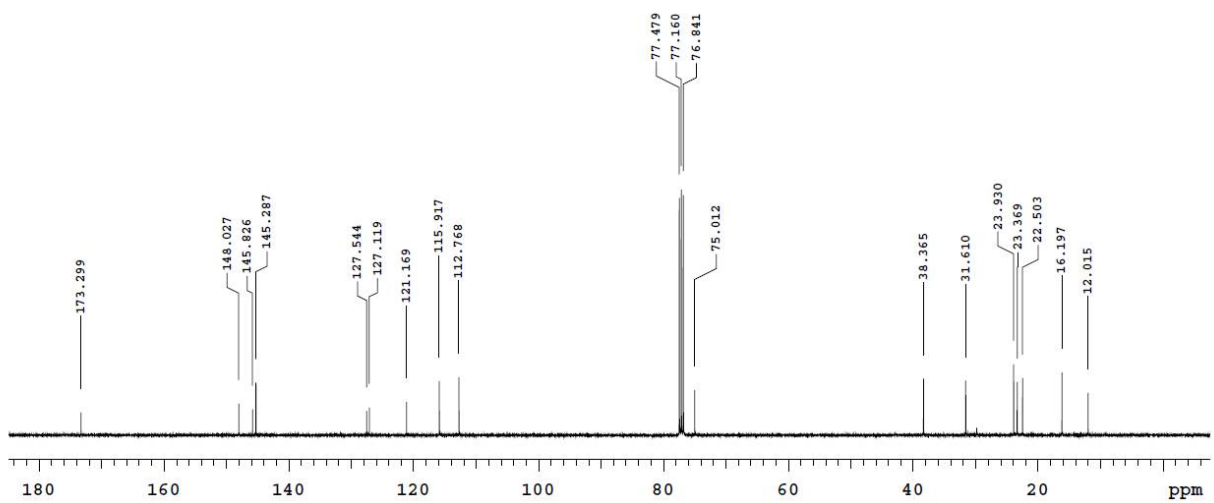

$^1\text{H}$  and  $^{13}\text{C}$  NMR spectra of 10a

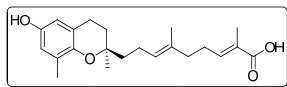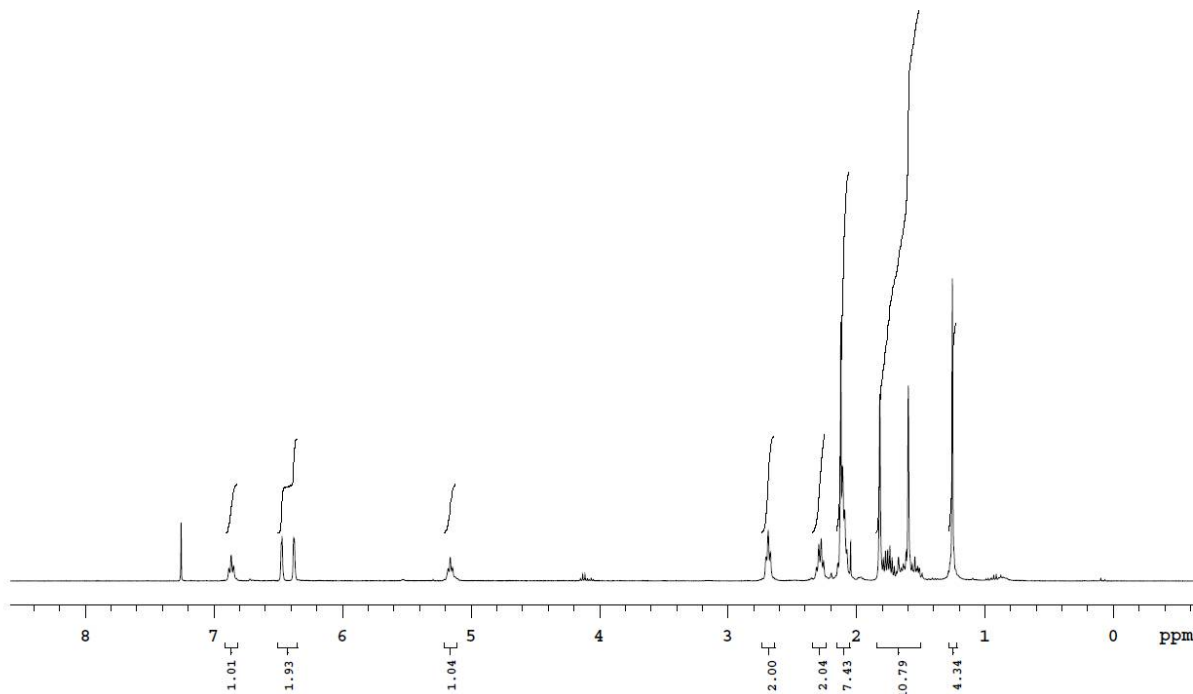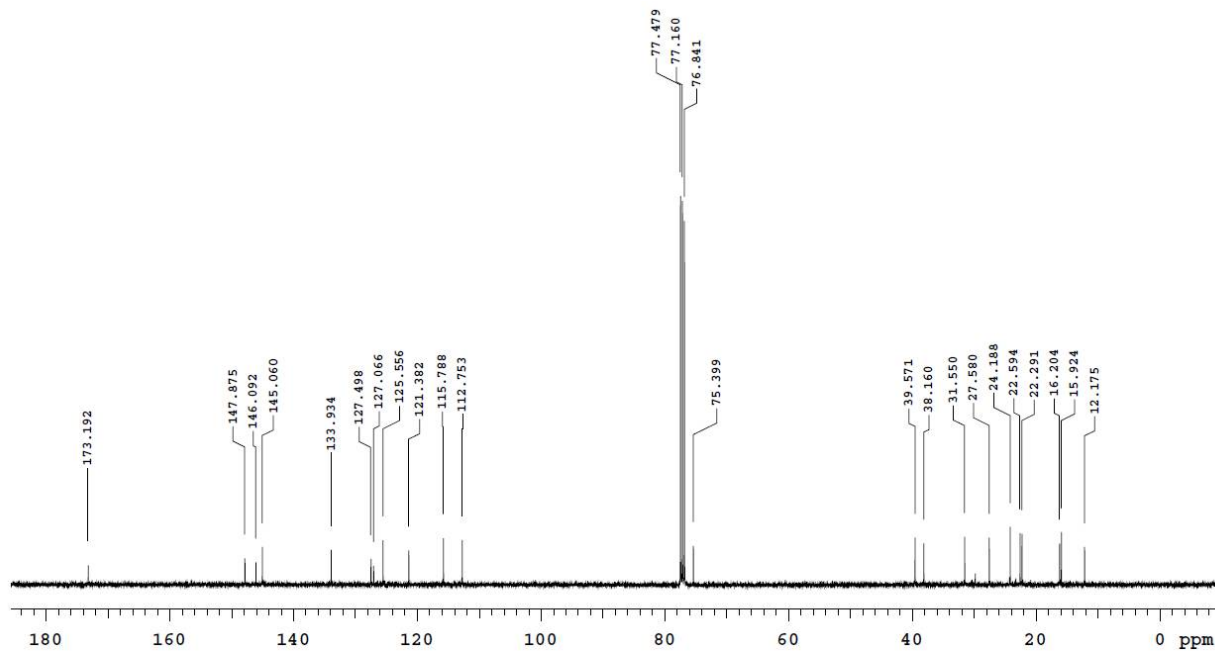

$^1\text{H}$  and  $^{13}\text{C}$  NMR spectra of **1**

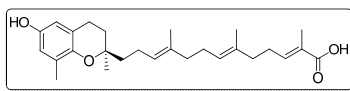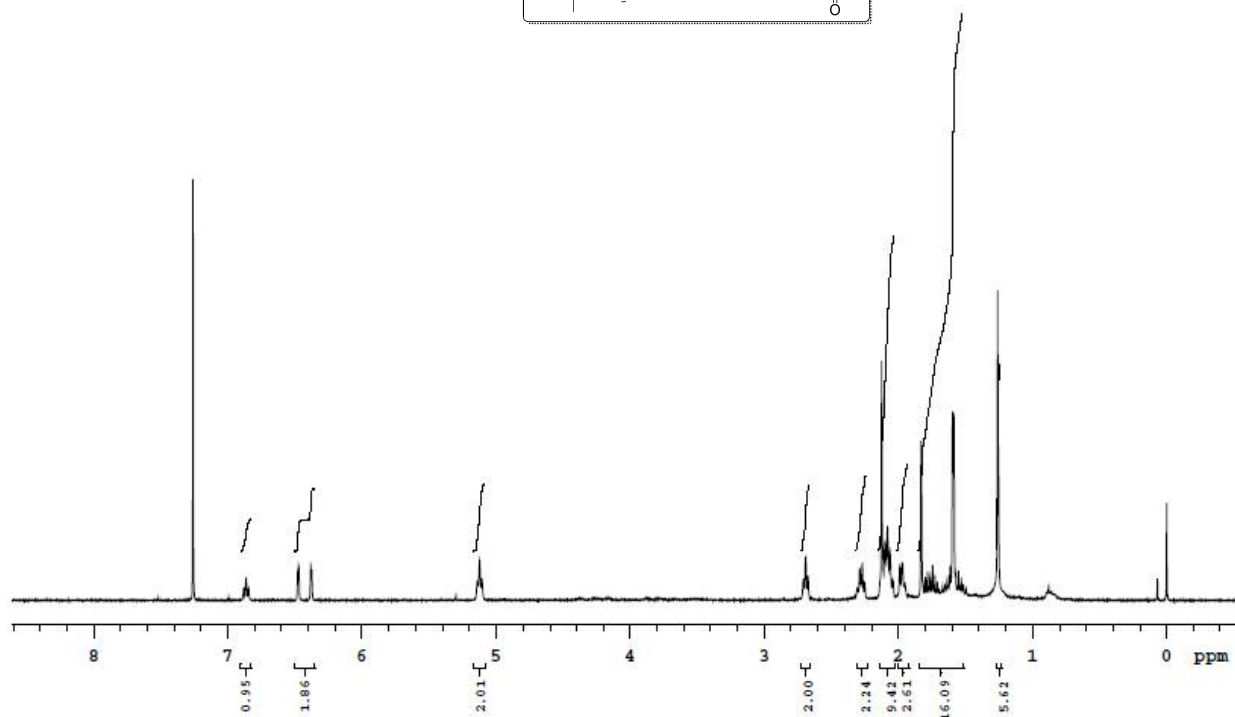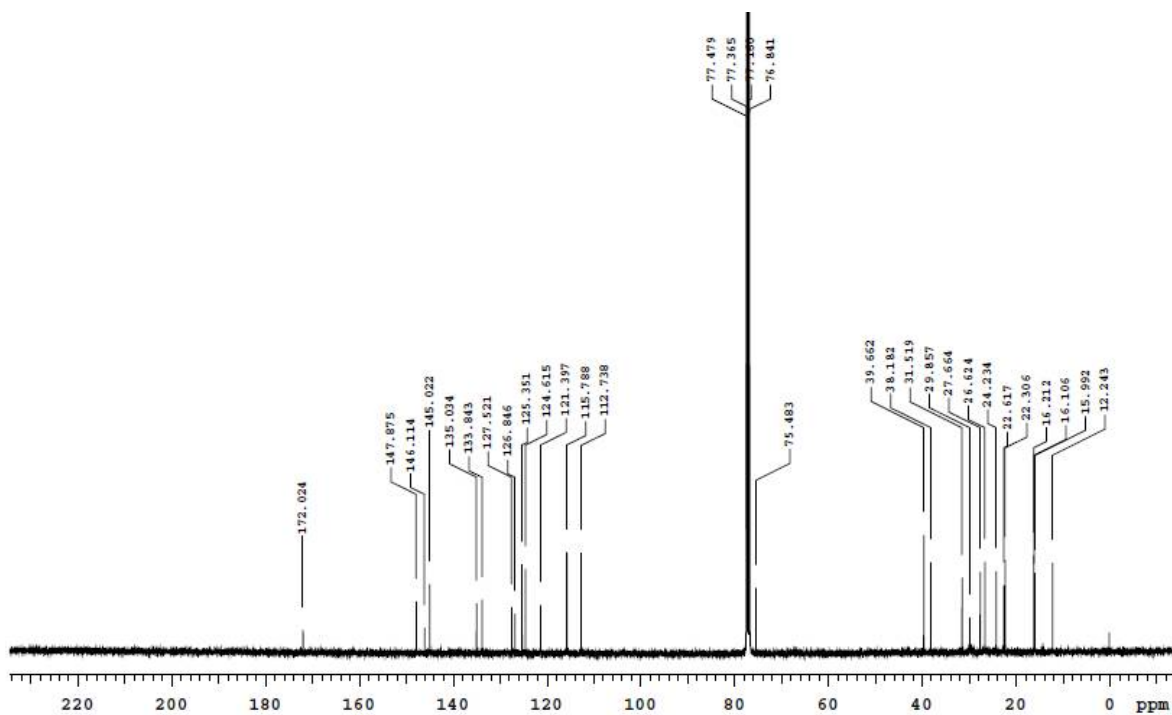

$^1\text{H}$  and  $^{13}\text{C}$  NMR spectra of 9b

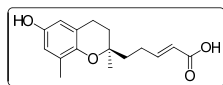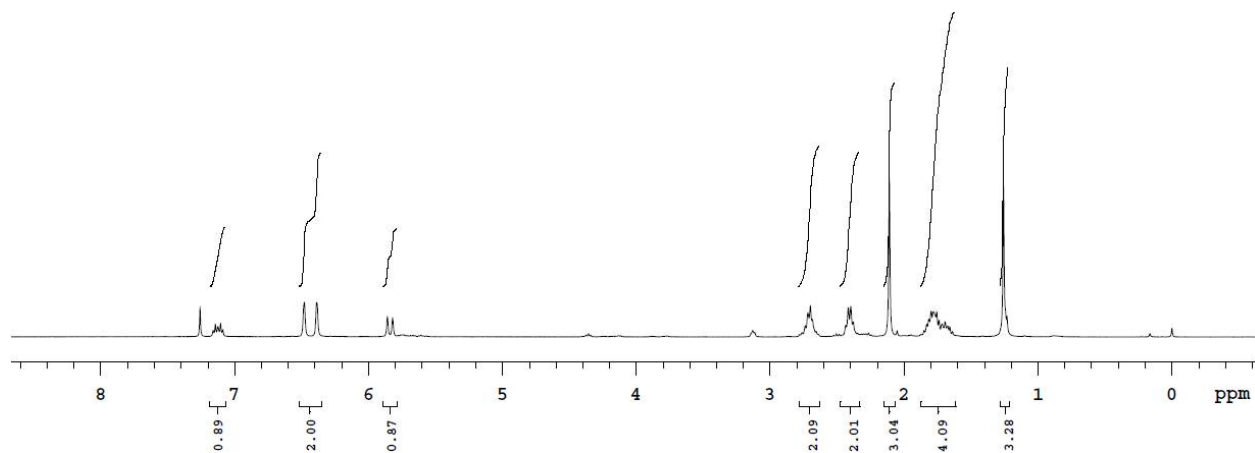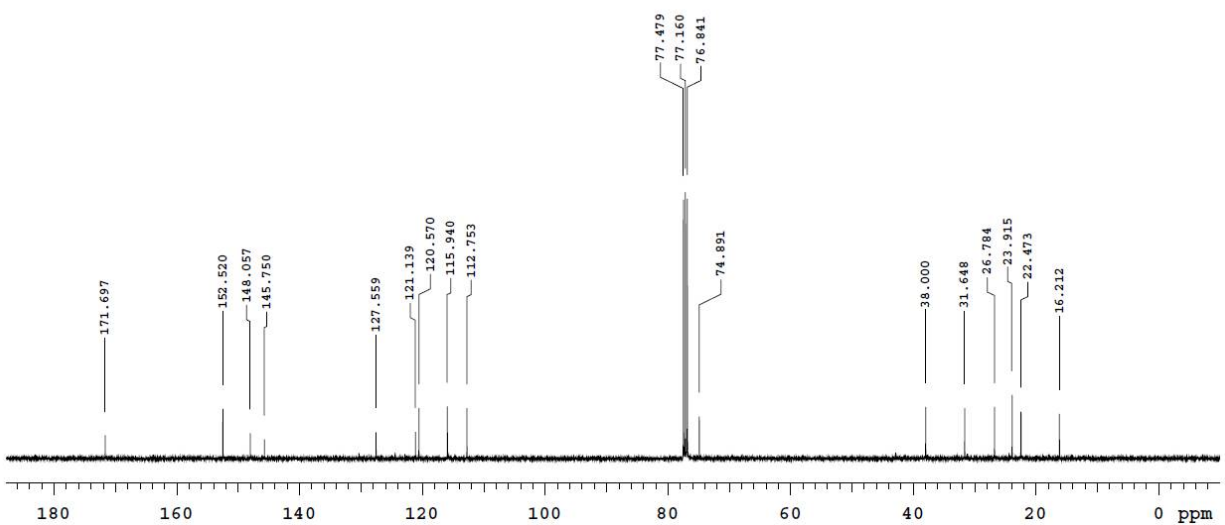

$^1\text{H}$  and  $^{13}\text{C}$  NMR spectra of 10b

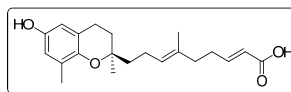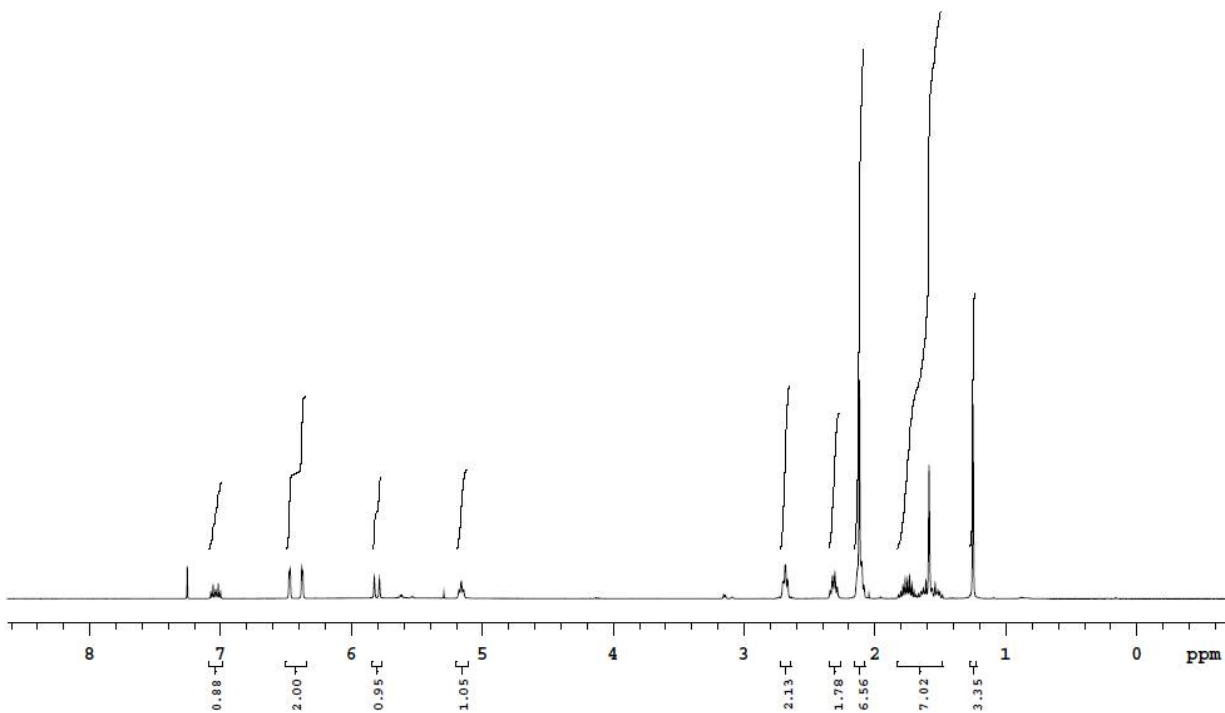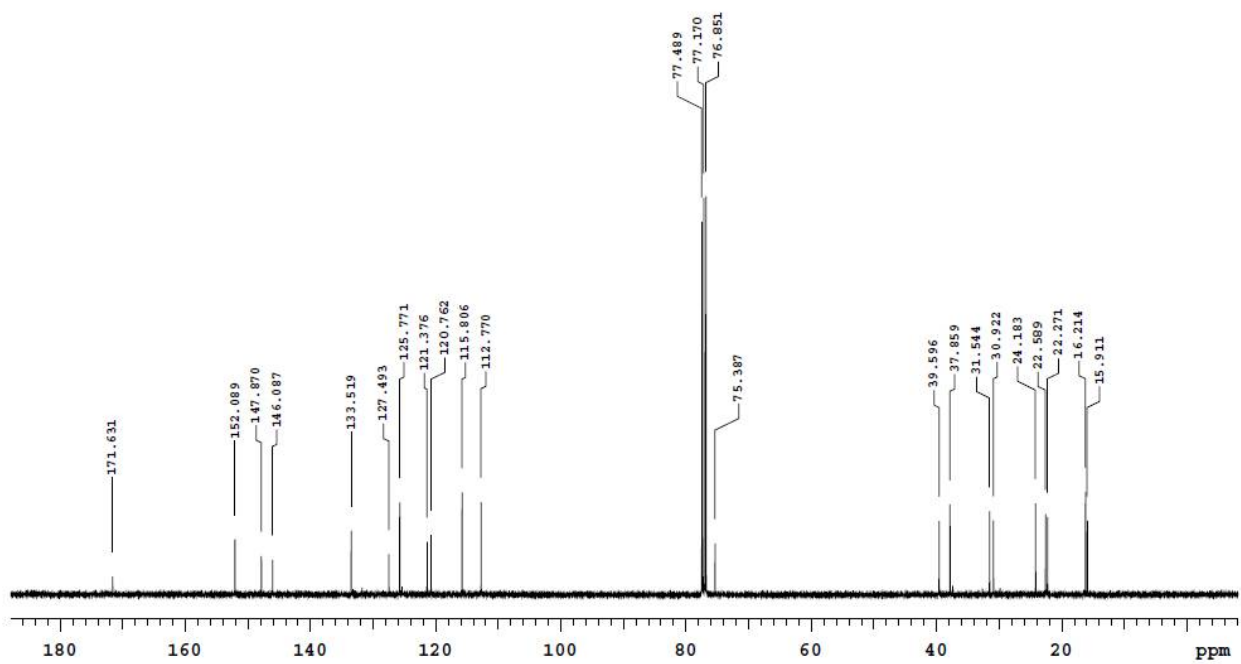

$^1\text{H}$  and  $^{13}\text{C}$  NMR spectra of 11

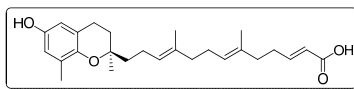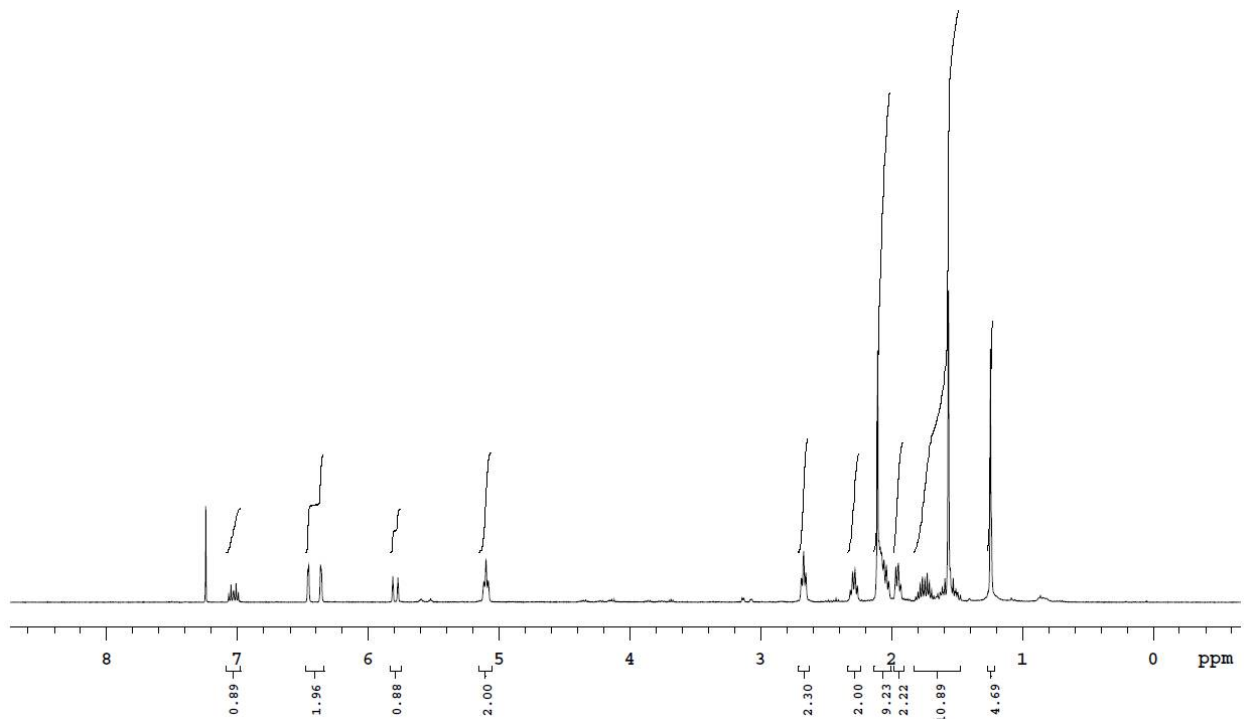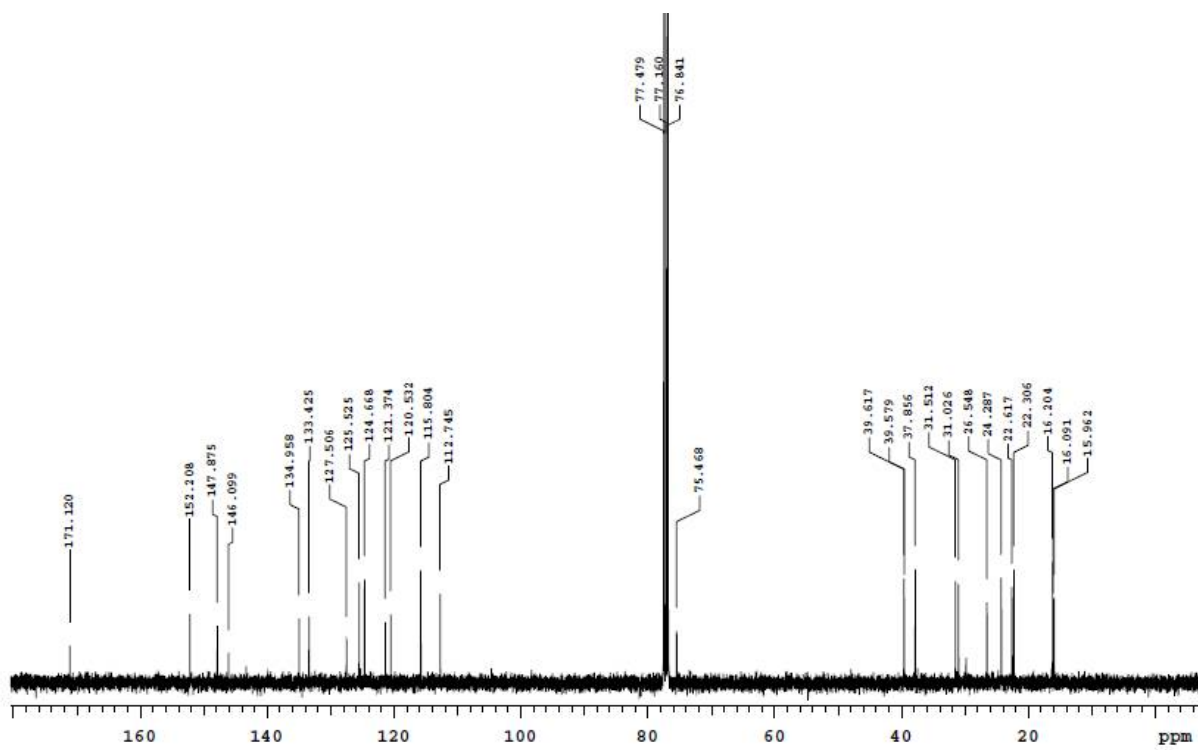

<sup>1</sup>H and <sup>13</sup>C NMR spectra of 12a

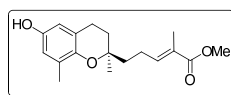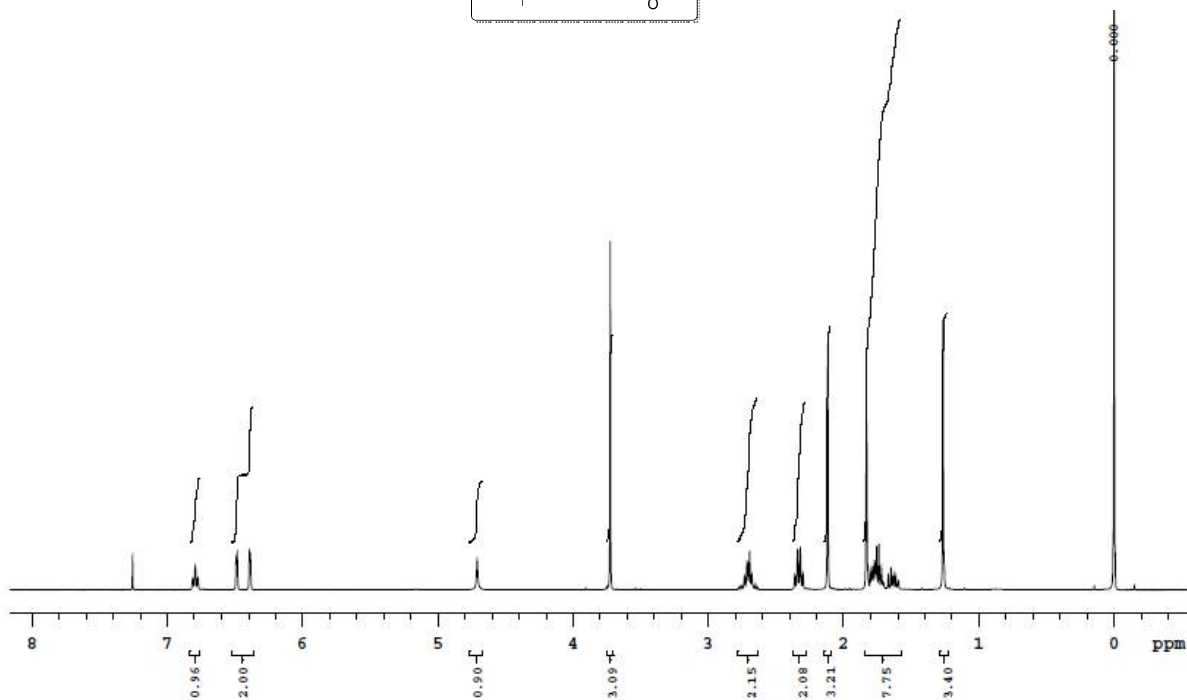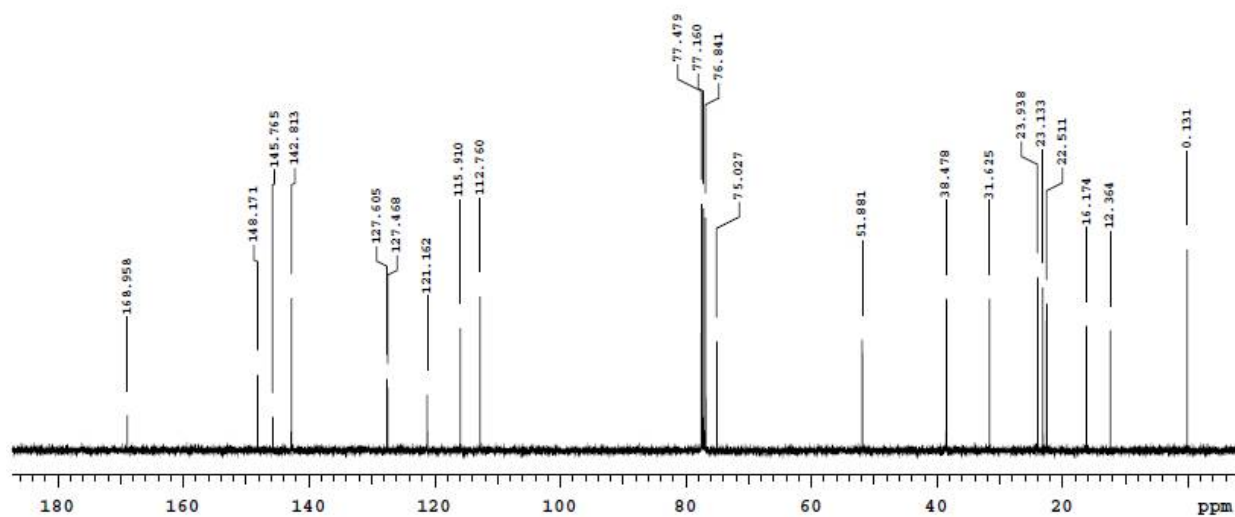



$^1\text{H}$  and  $^{13}\text{C}$  NMR spectra of 13a

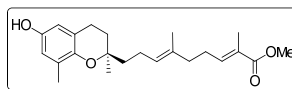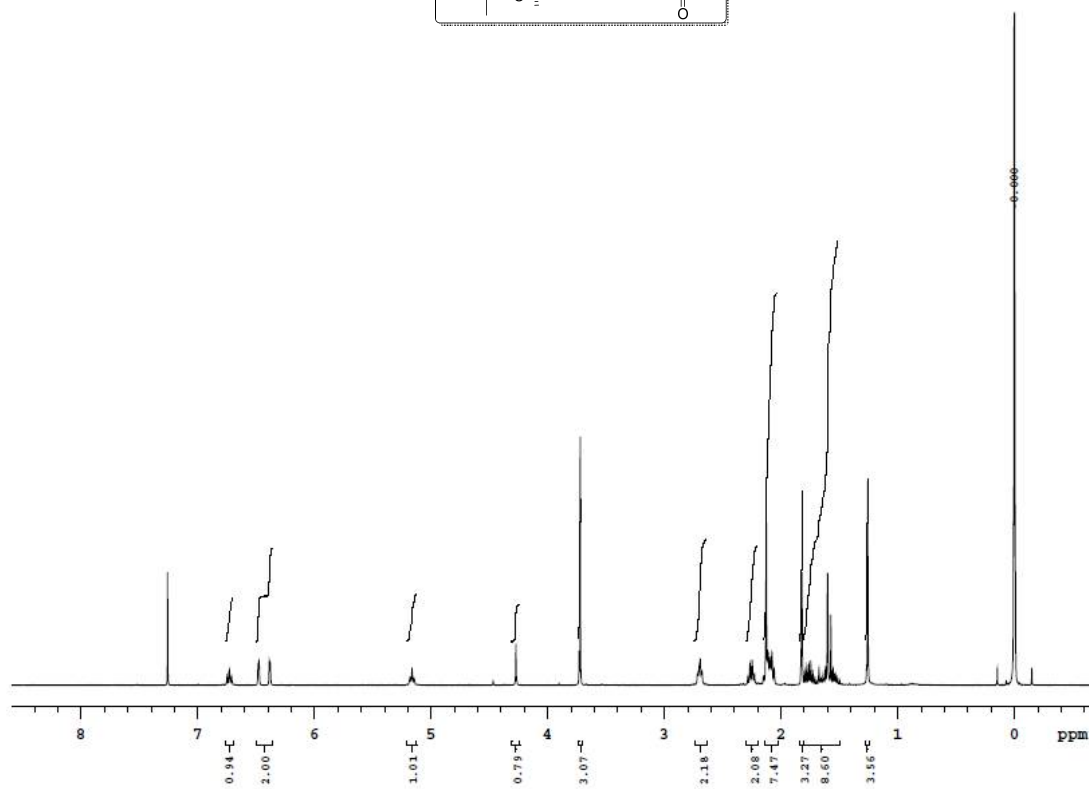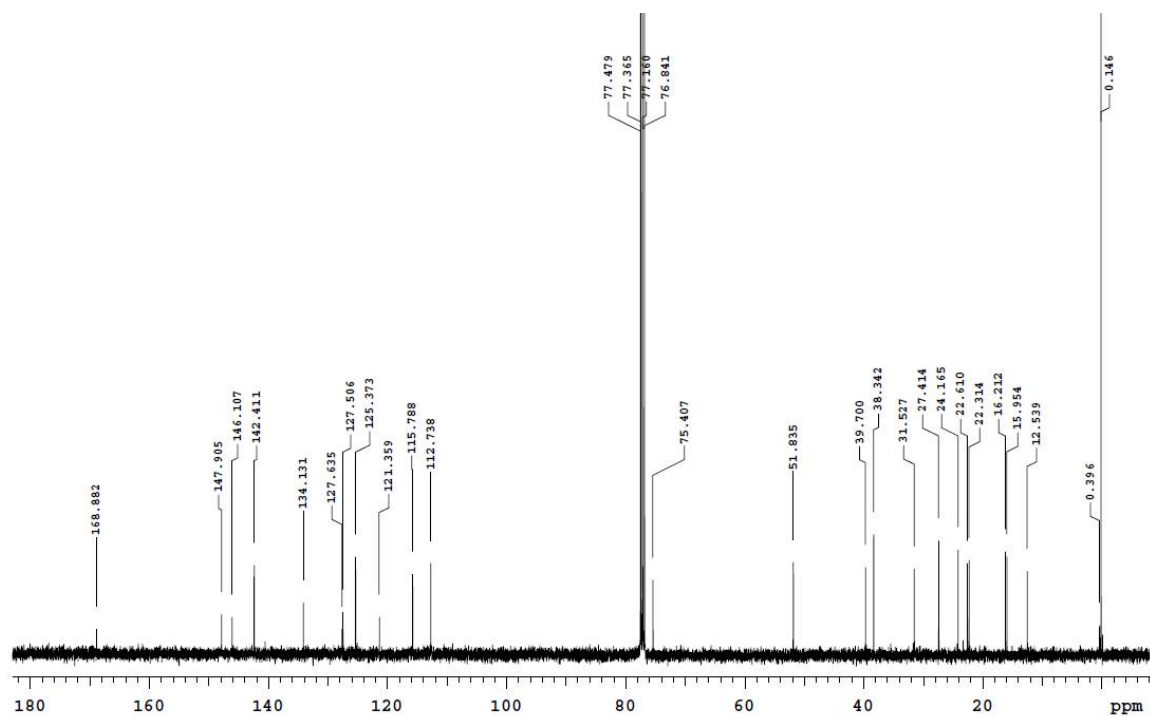

<sup>1</sup>H and <sup>13</sup>C NMR spectra of 14a

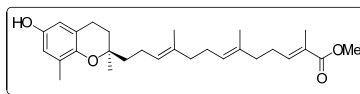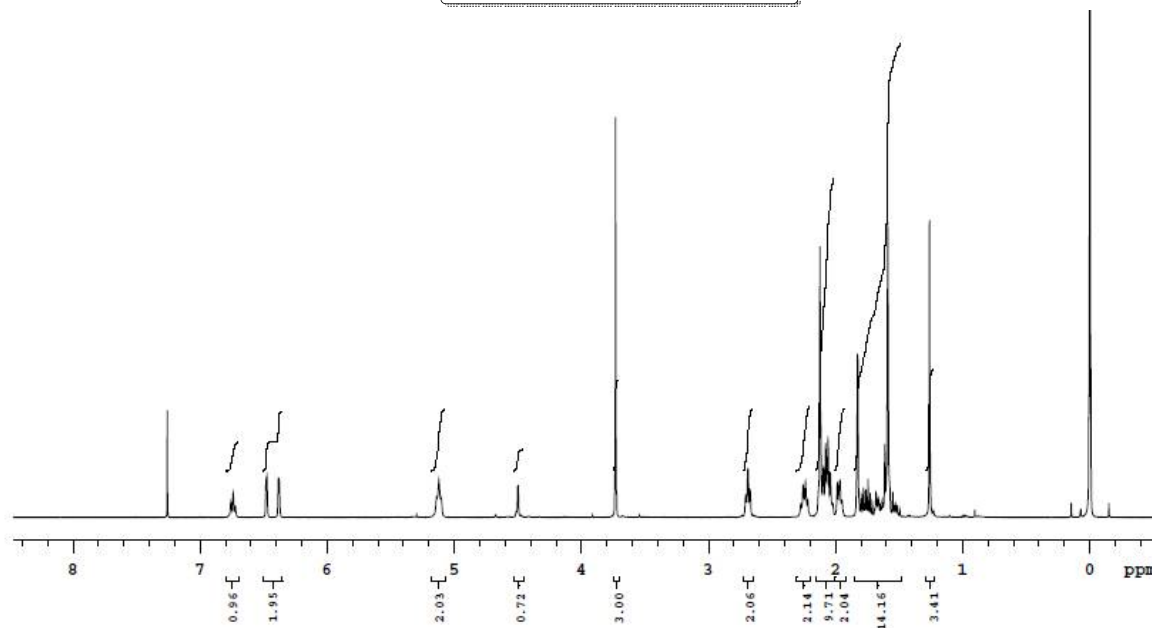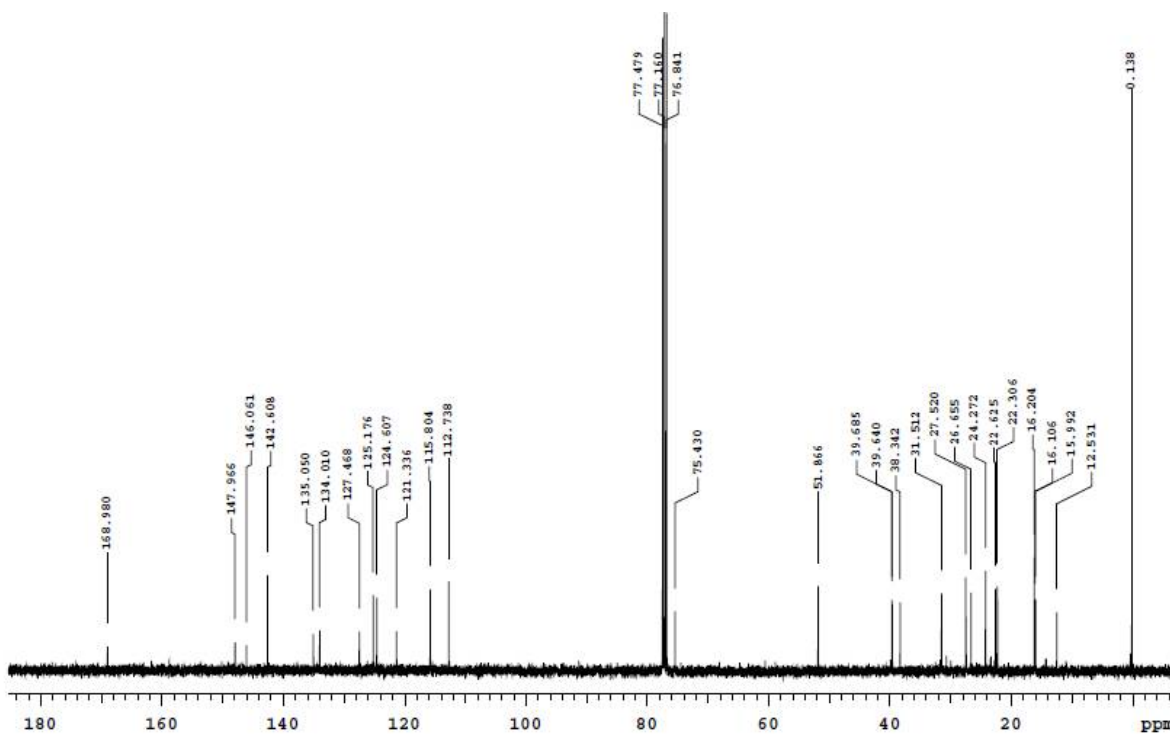

$^1\text{H}$  and  $^{13}\text{C}$  NMR spectra of 12b

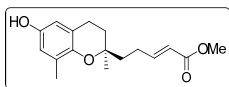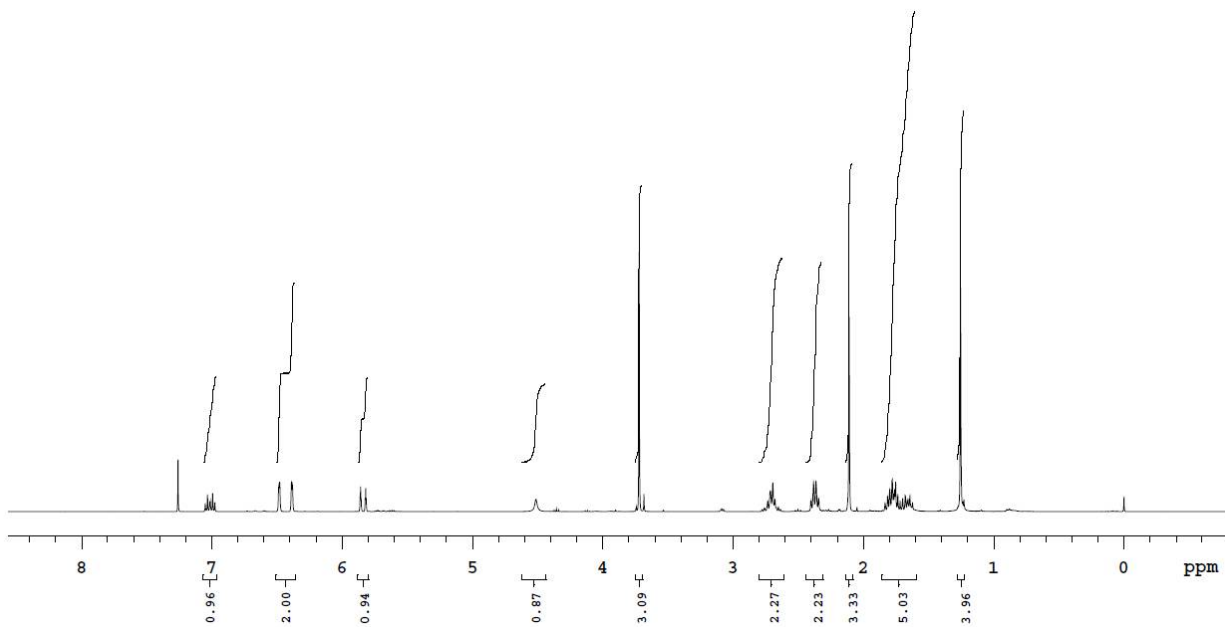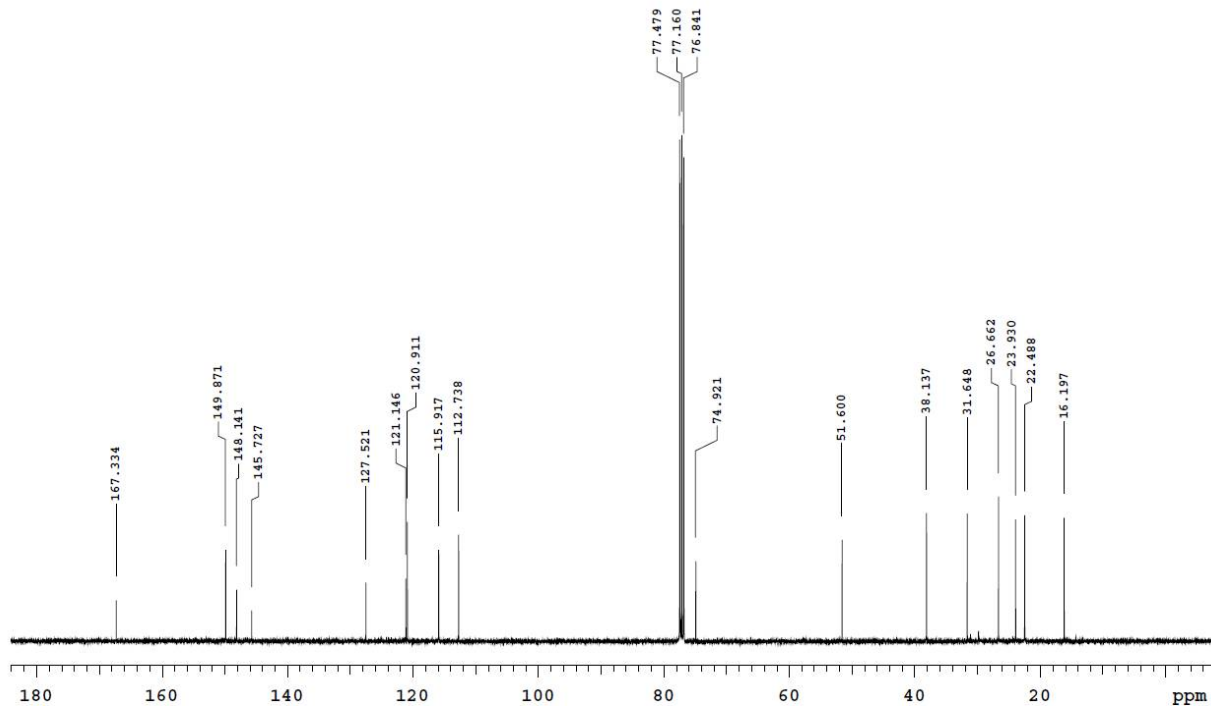

$^1\text{H}$  and  $^{13}\text{C}$  NMR spectra of 13b

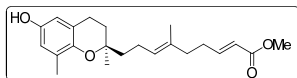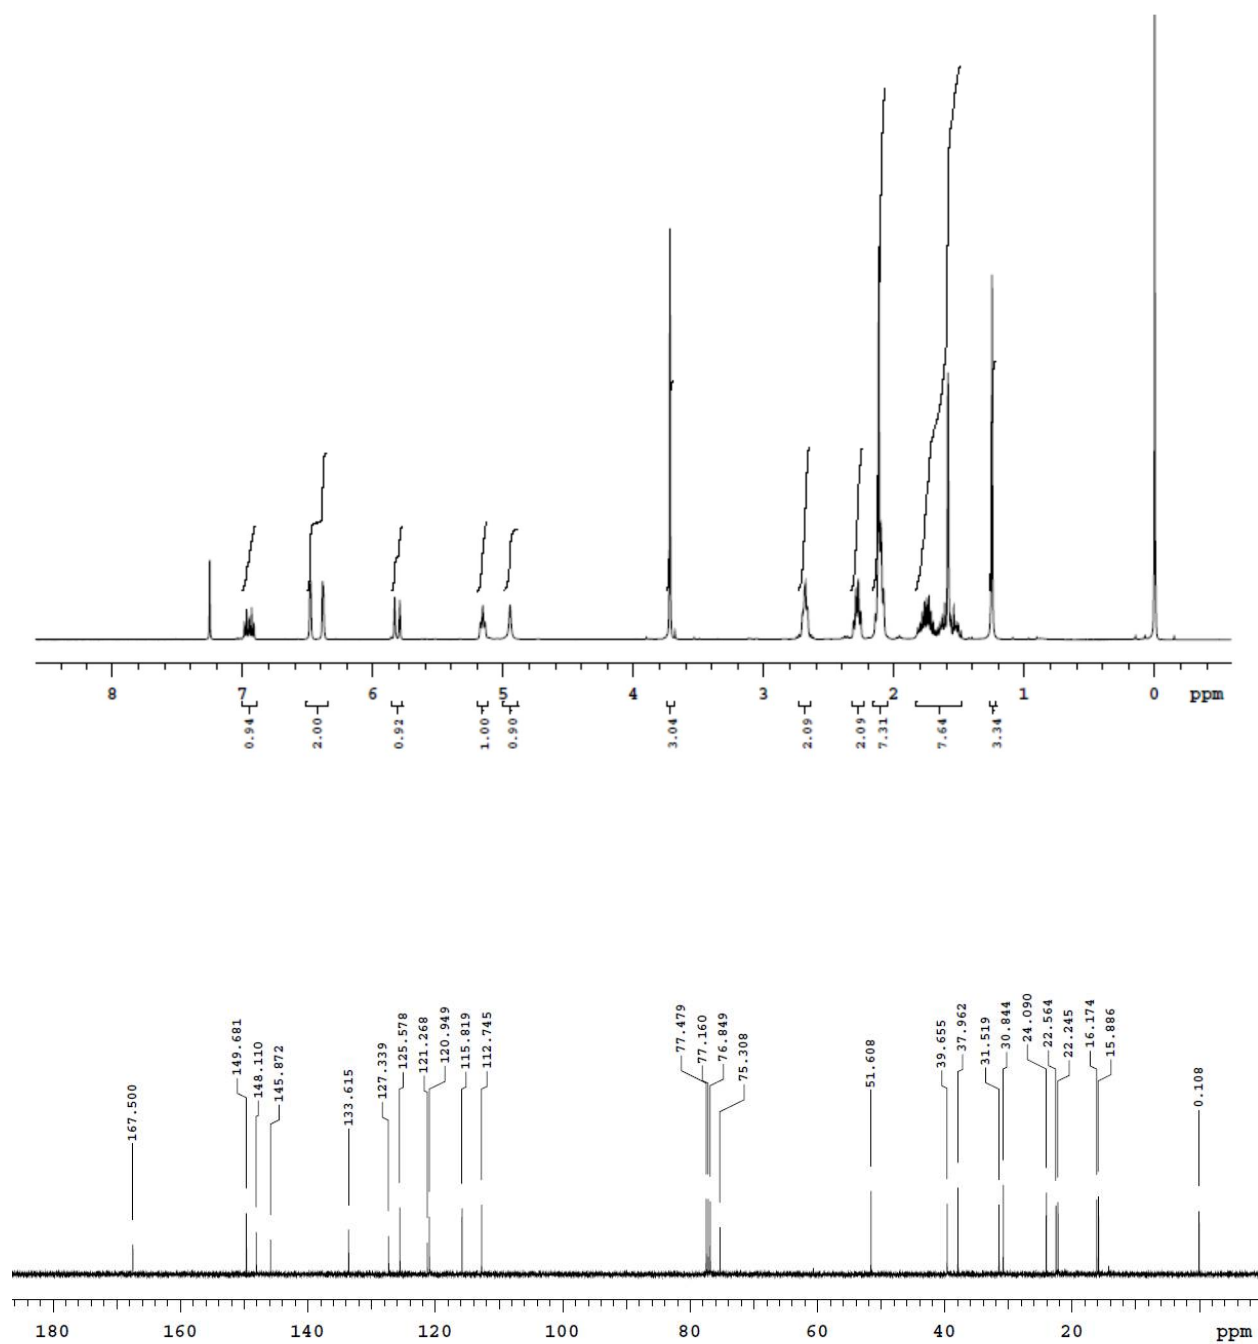

$^1\text{H}$  and  $^{13}\text{C}$  NMR spectra of 14b

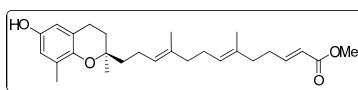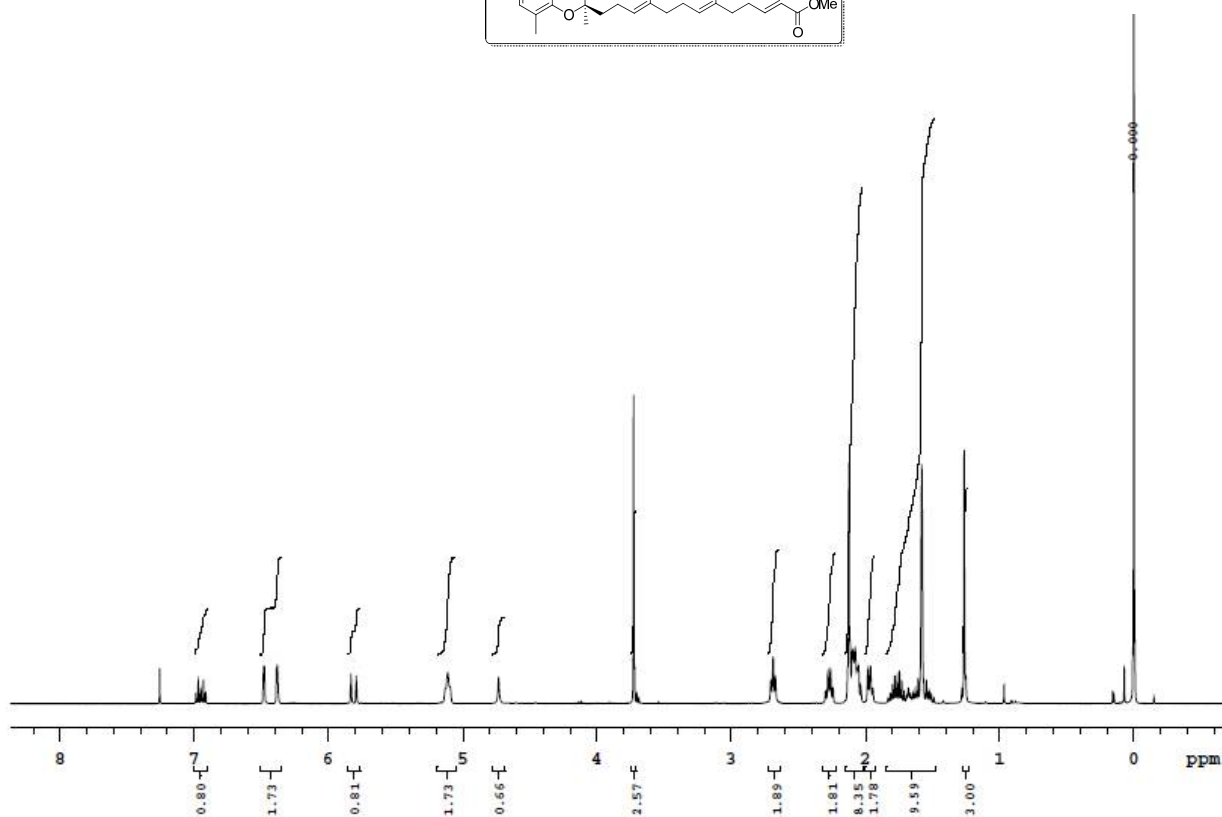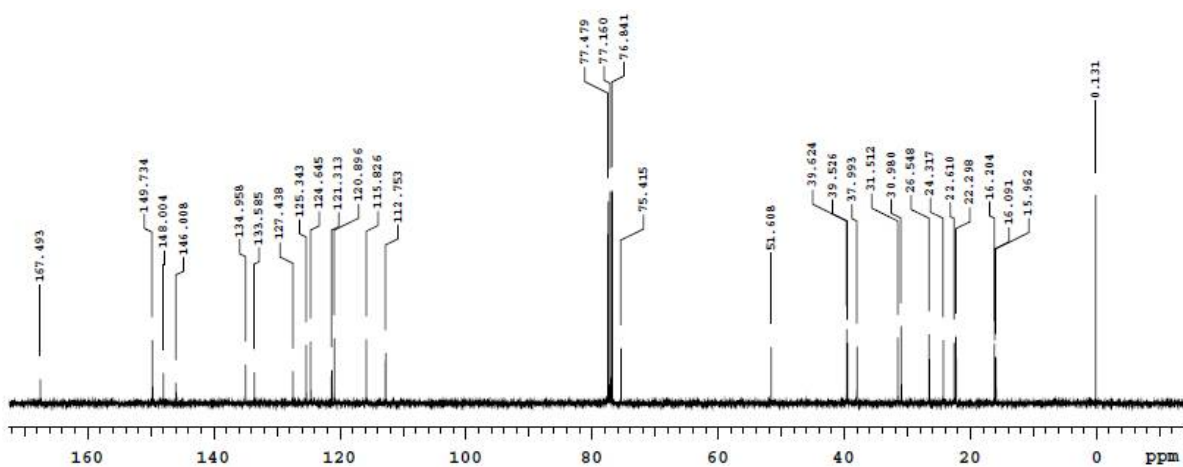

<sup>1</sup>H and <sup>13</sup>C NMR spectra of 15

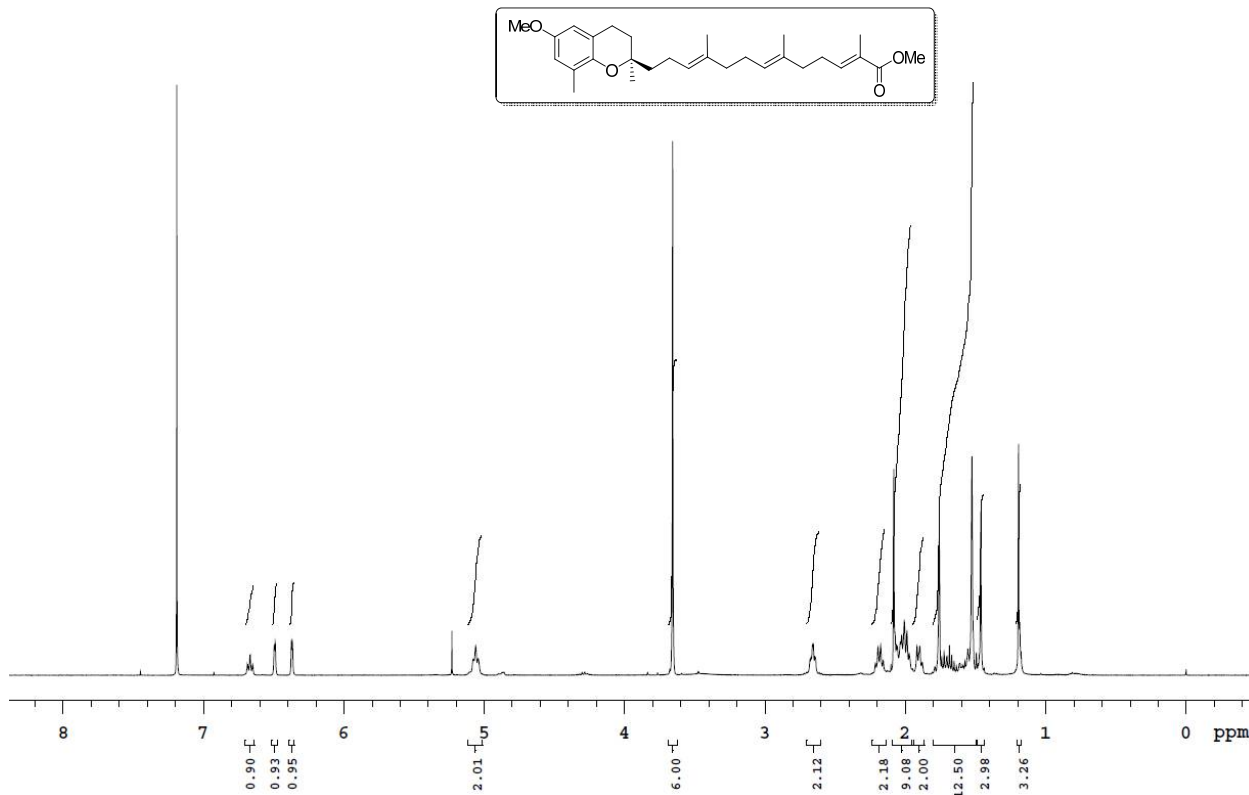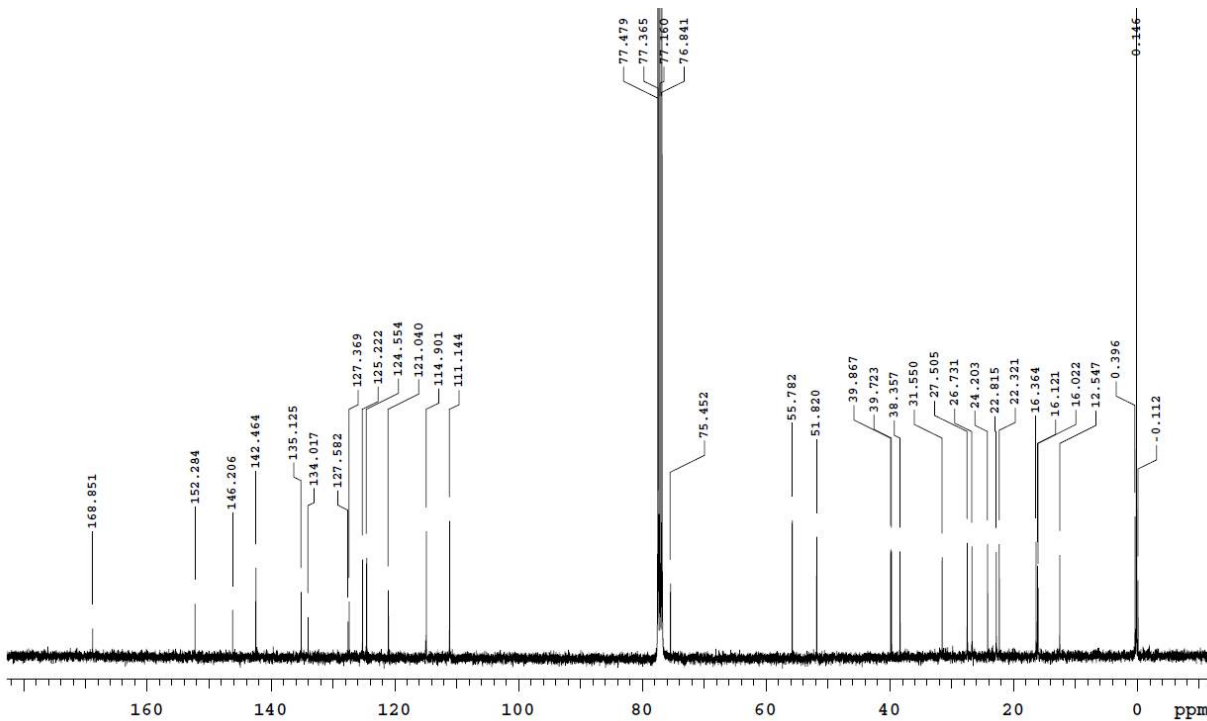

<sup>1</sup>H and <sup>13</sup>C NMR spectra of 16

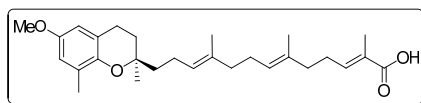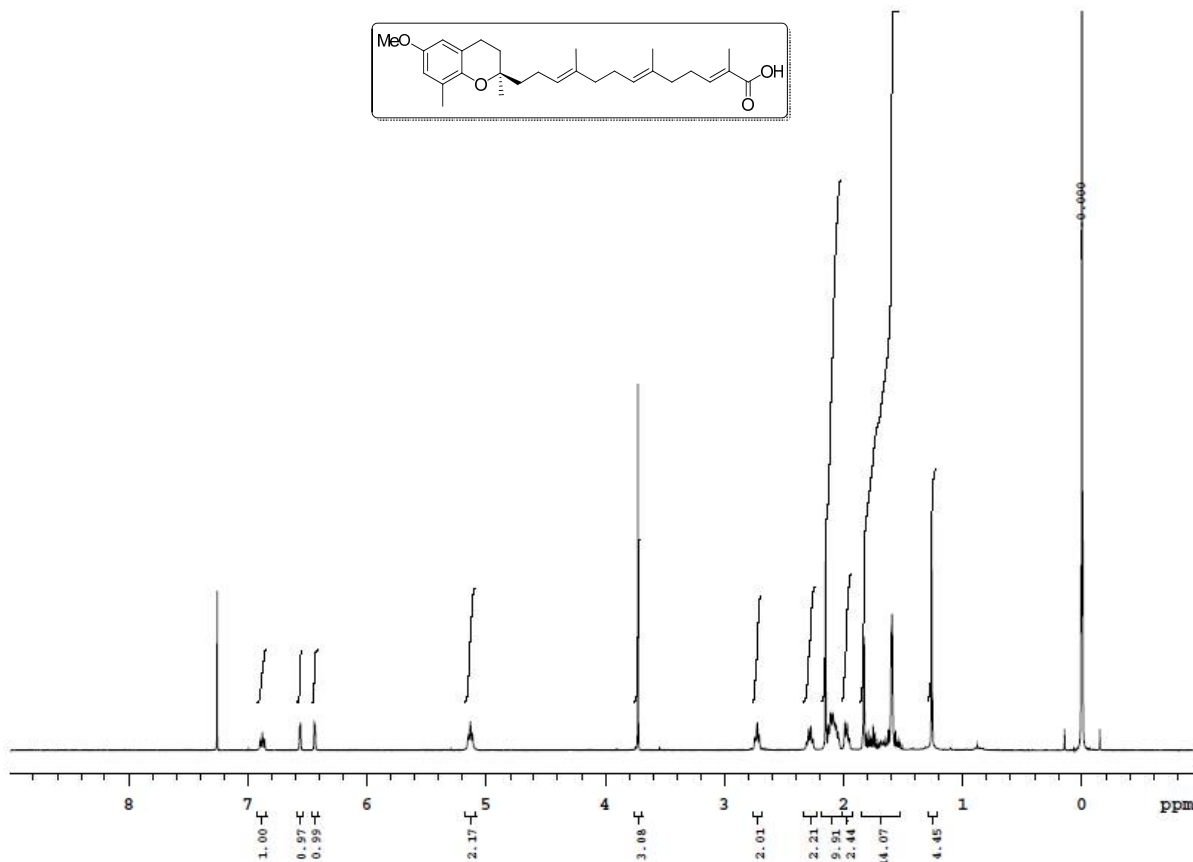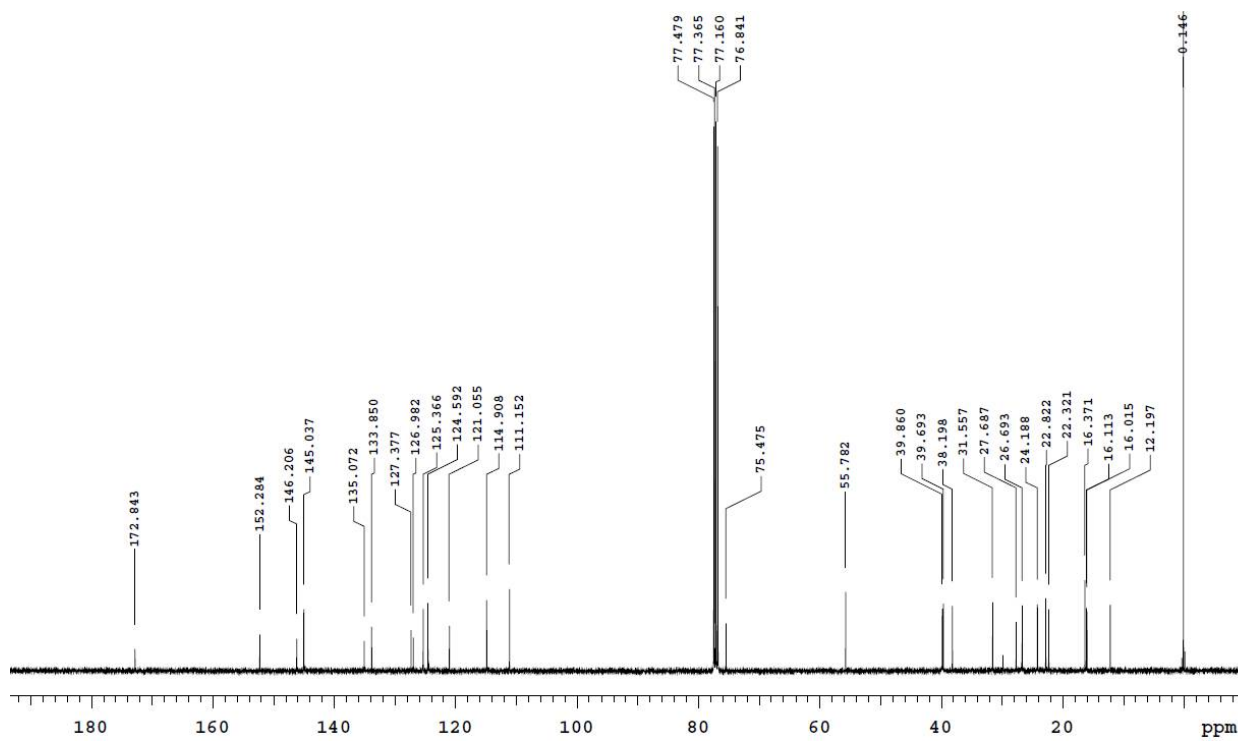

$^1\text{H}$  and  $^{13}\text{C}$  NMR spectra of 17

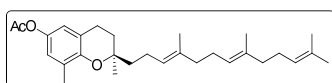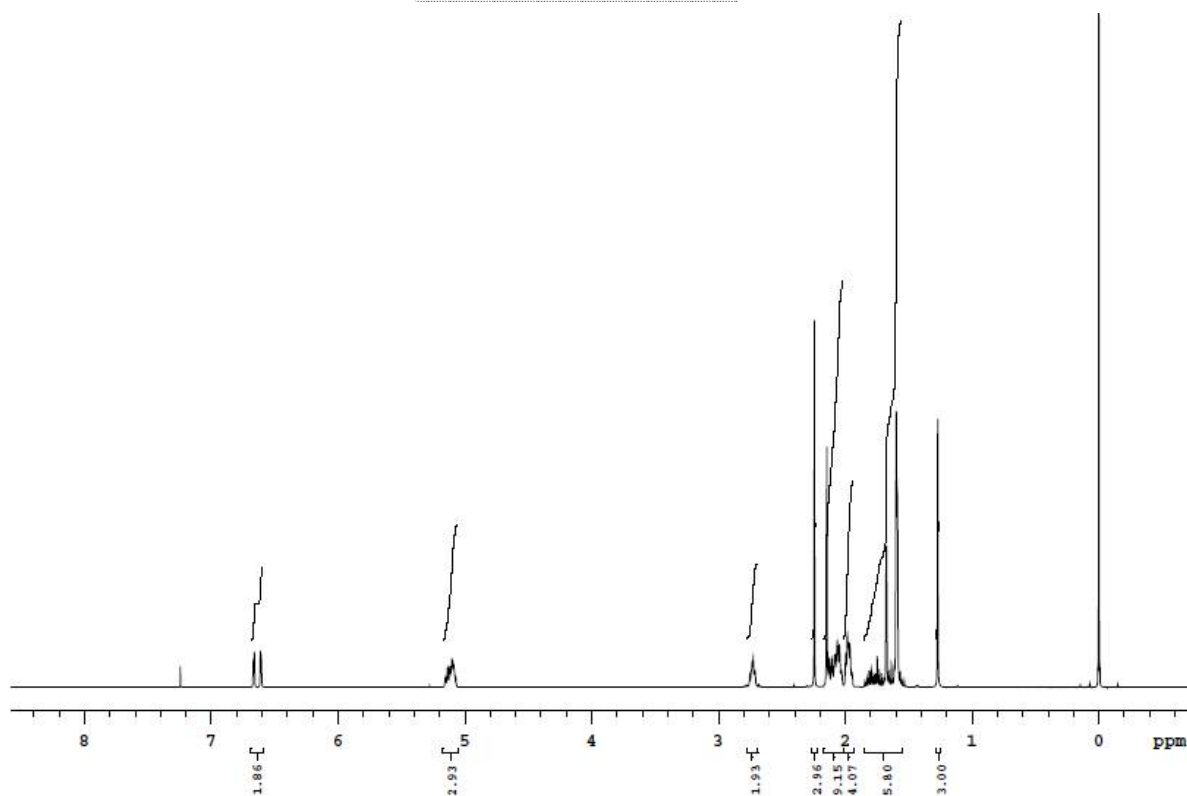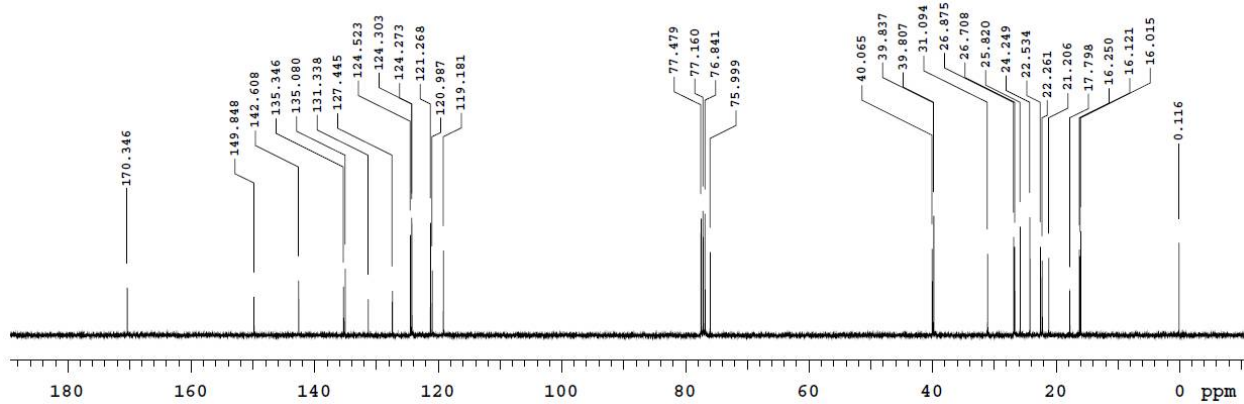



$^1\text{H}$  and  $^{13}\text{C}$  NMR spectra of 19

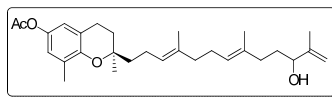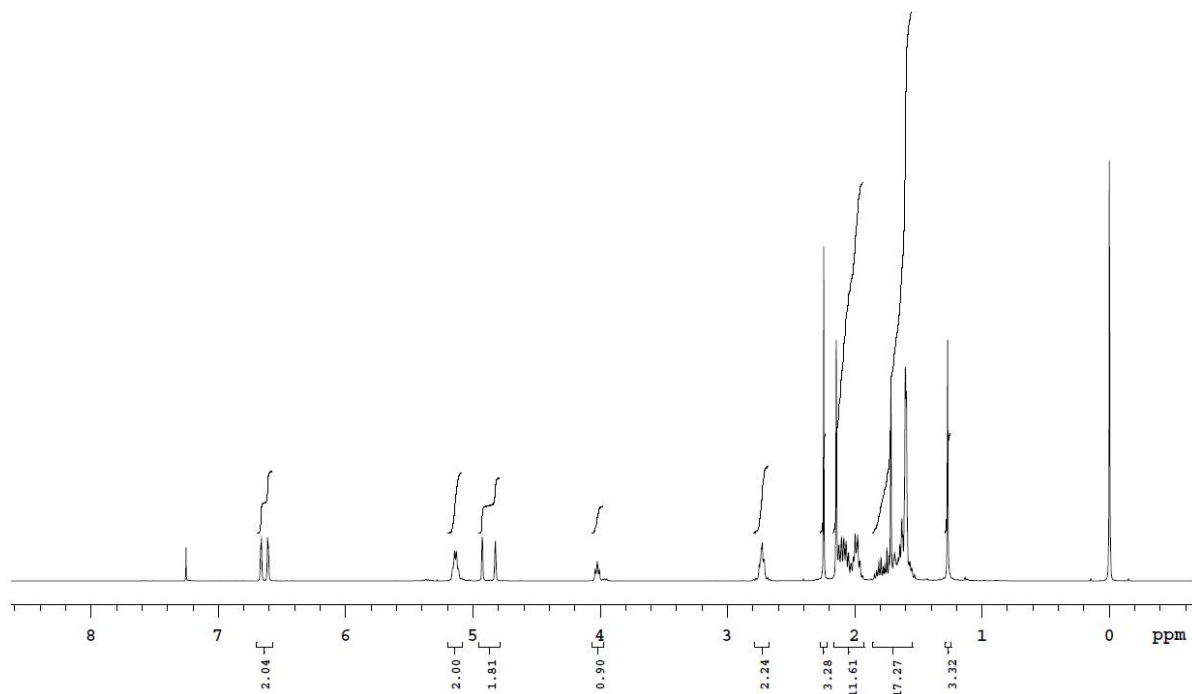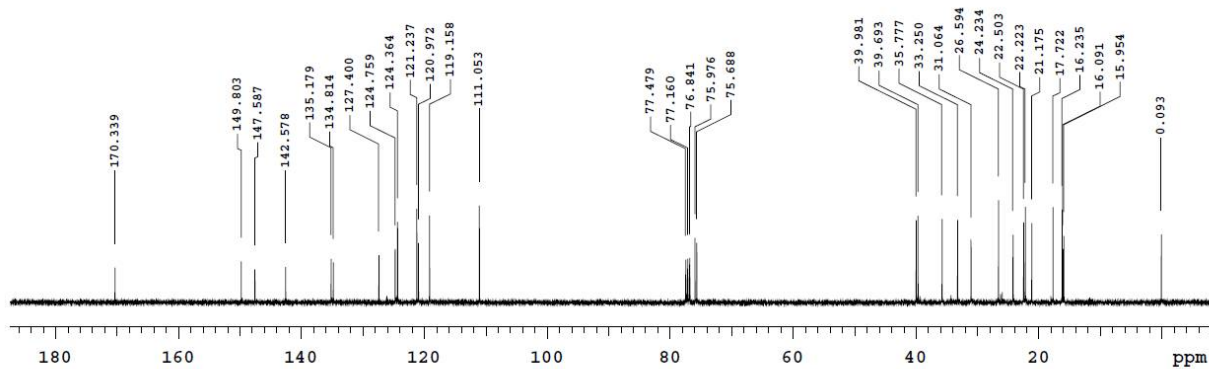

$^1\text{H}$  and  $^{13}\text{C}$  NMR spectra of 20

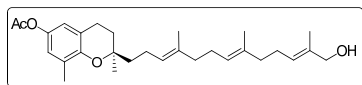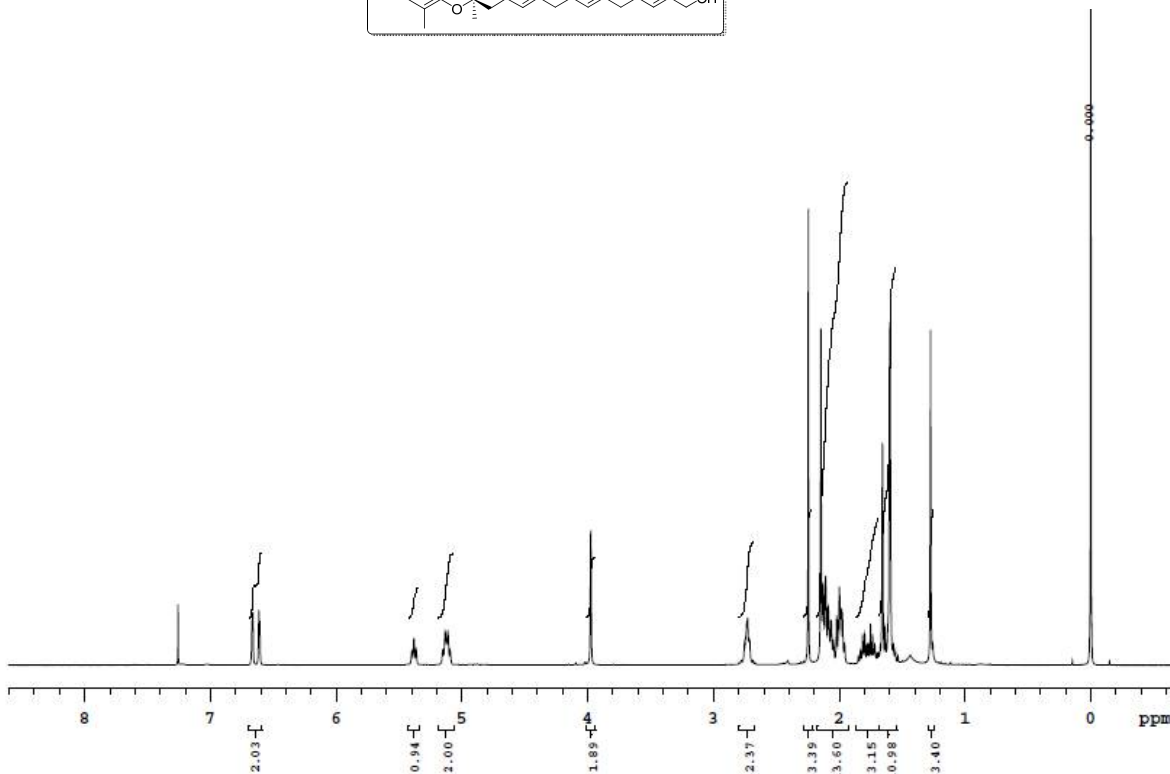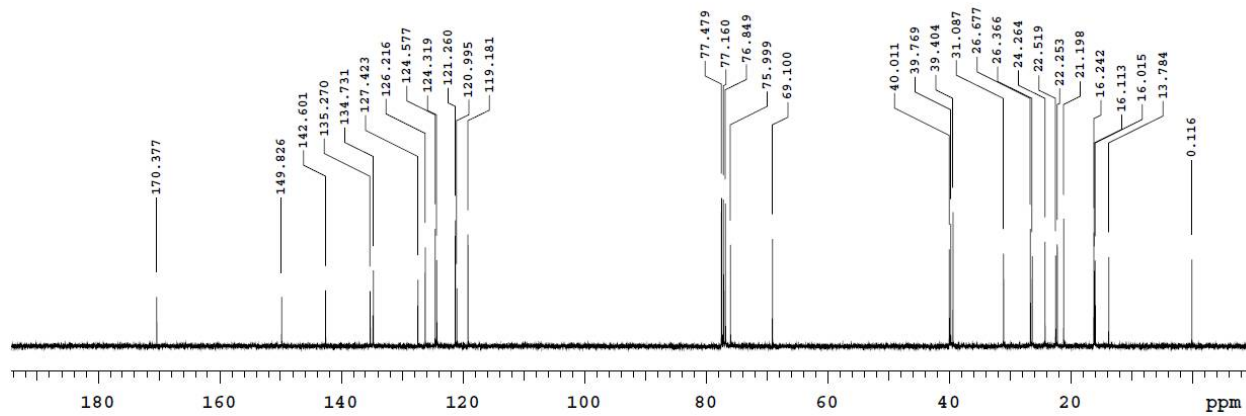

<sup>1</sup>H and <sup>13</sup>C NMR spectrum of 21

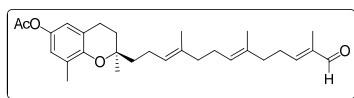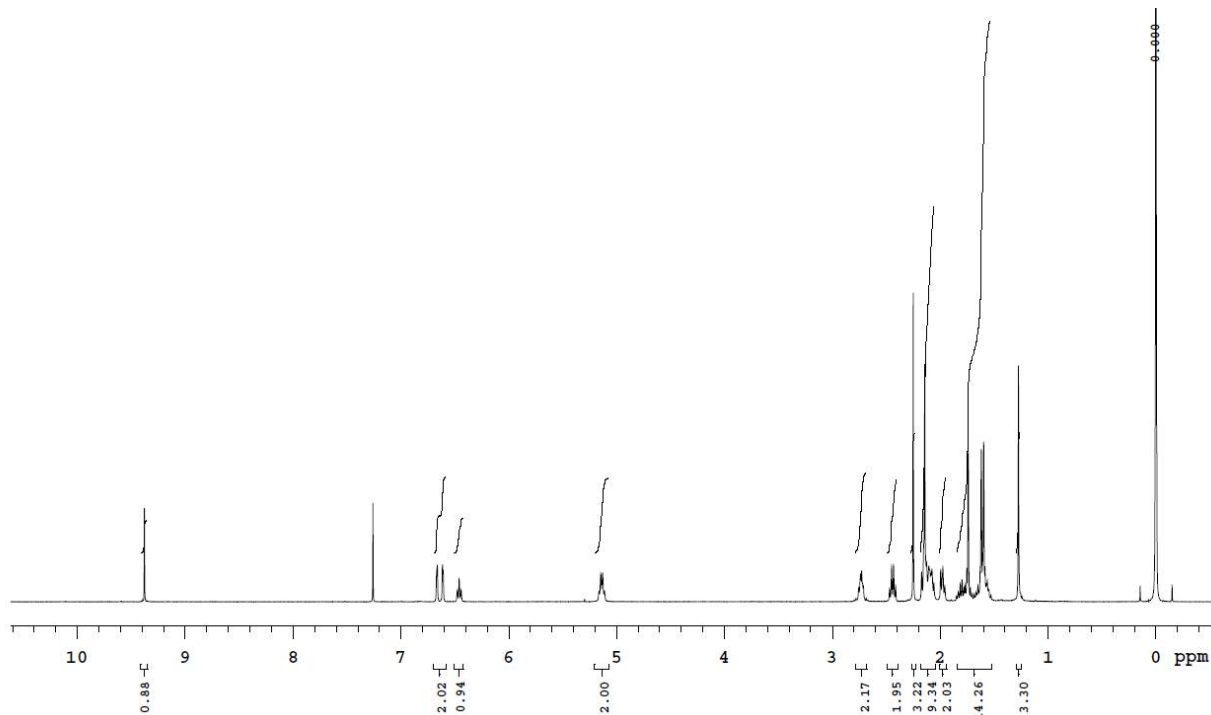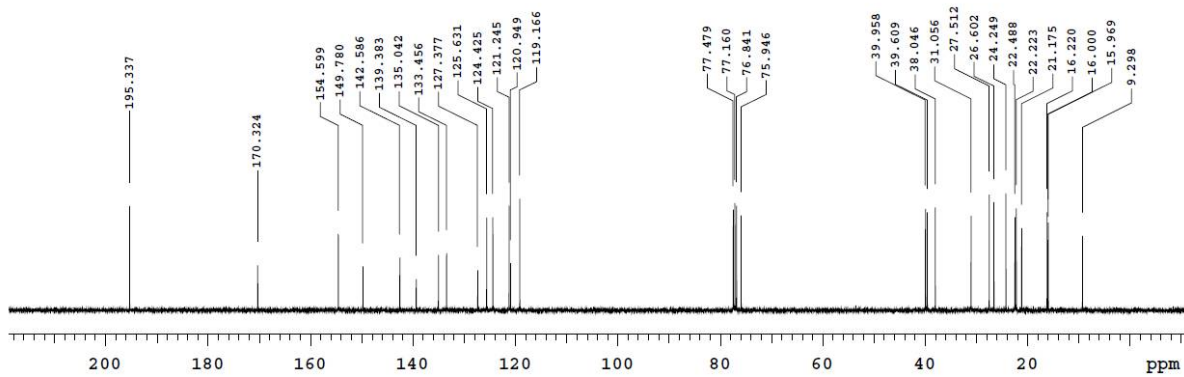

$^1\text{H}$  and  $^{13}\text{C}$  NMR spectrum of 22

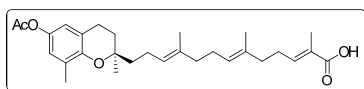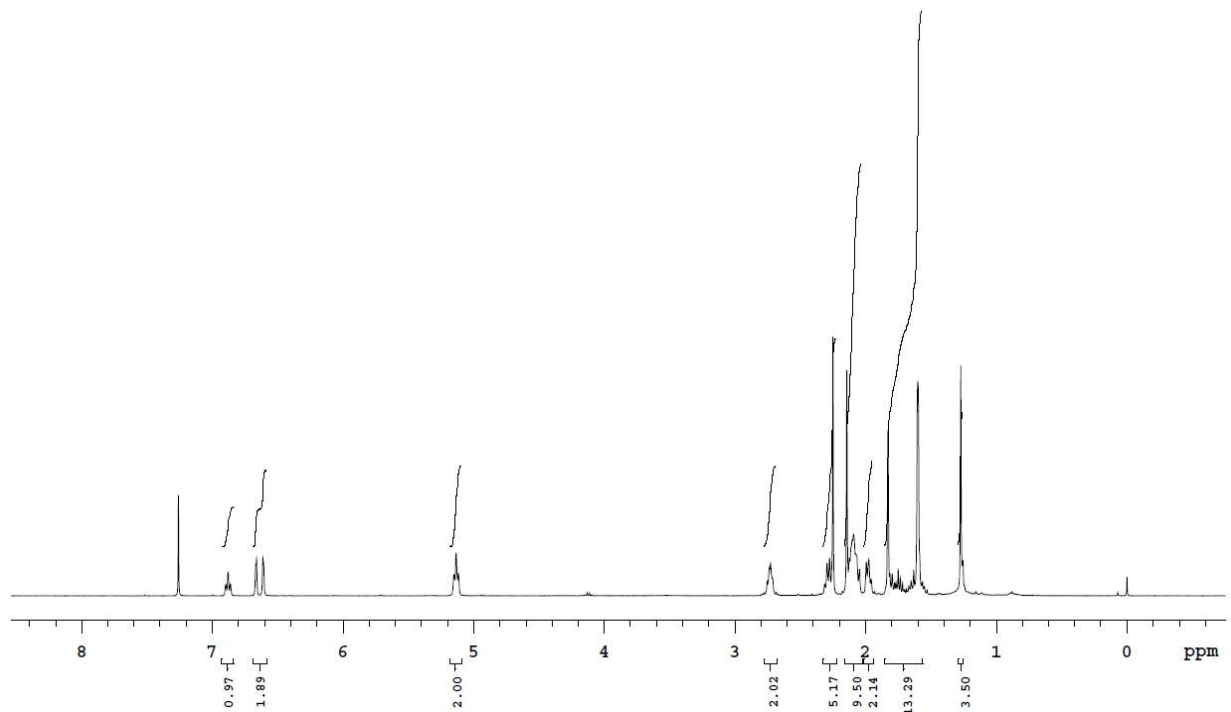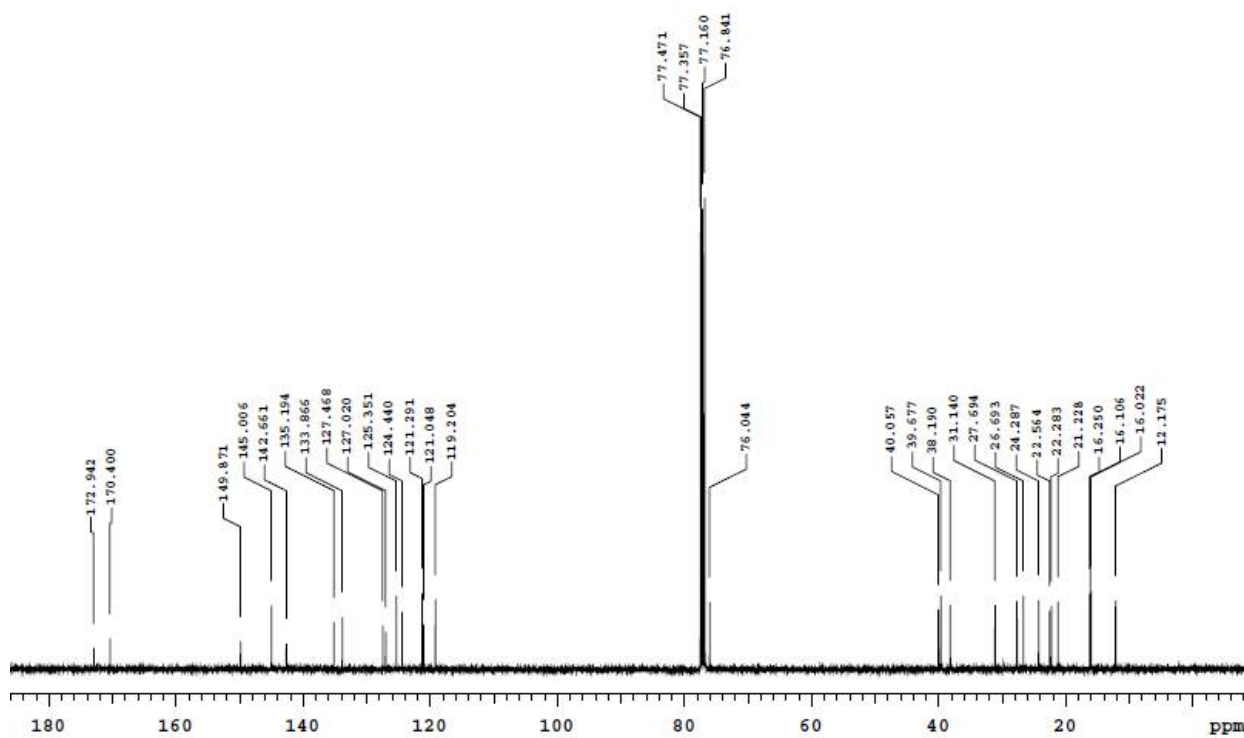

Supplement: molecules-25-05847-s001.pdf [file molecules-25-05847-s001.pdf]
